# Supplementary material for: Variant-specific deleterious mutations in the SARS-CoV-2 genome reveal immune responses and potentials for prophylactic vaccine development
Source: PubMed Central journal article supplement (PMC9941545; doi:10.3389/fphar.2023.1090717), 2023-02-07

# B cell epitope prediction for Delta variant

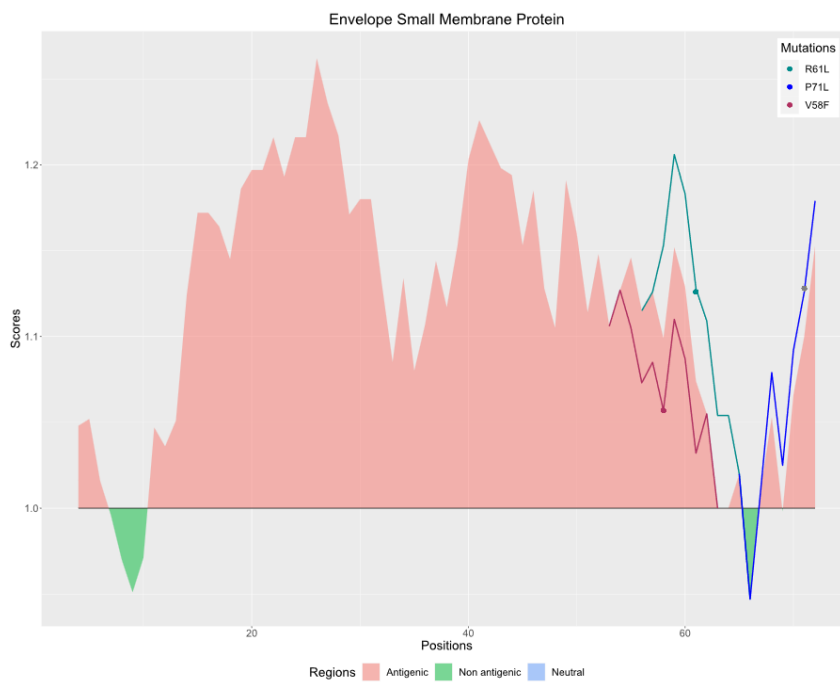

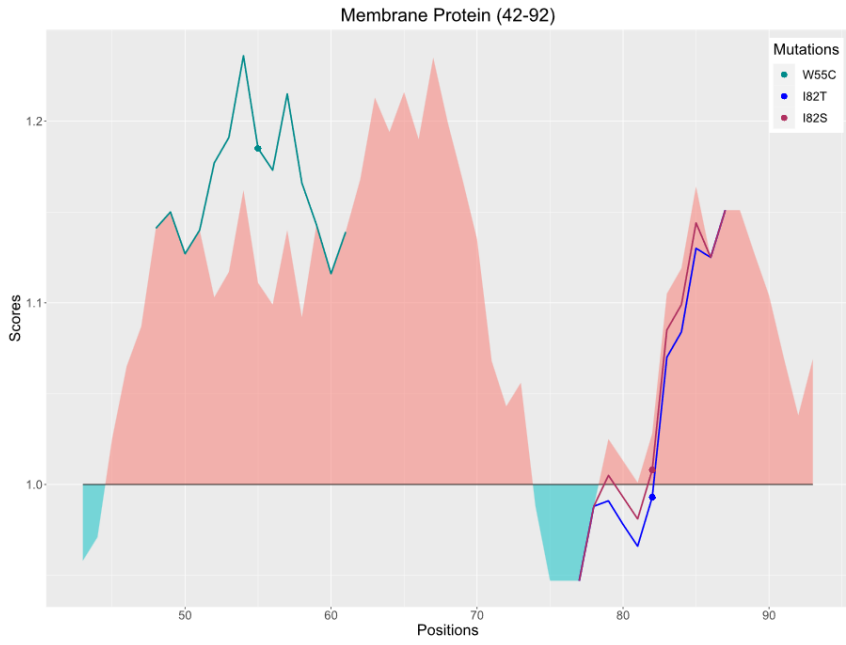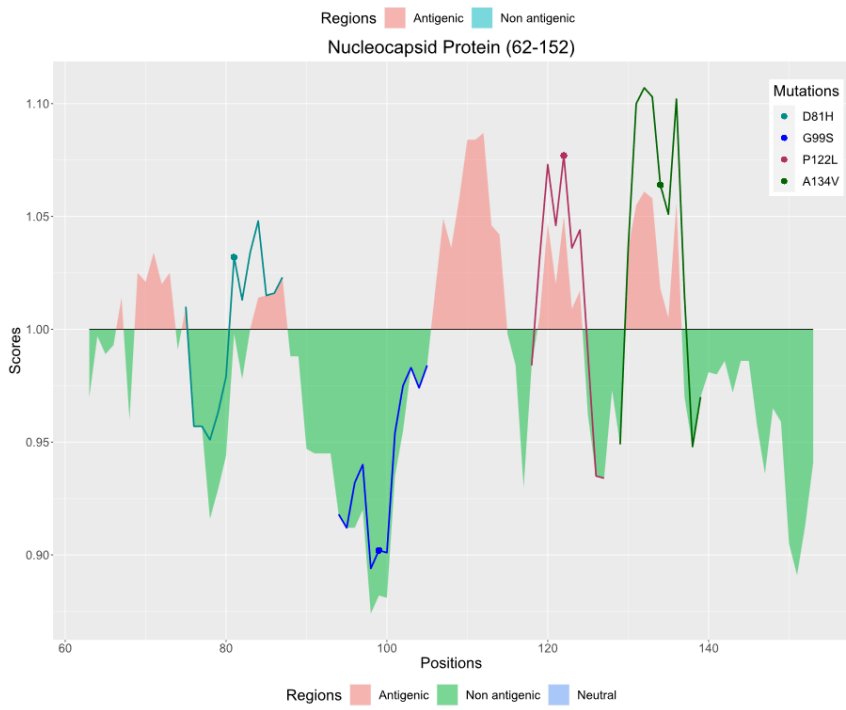

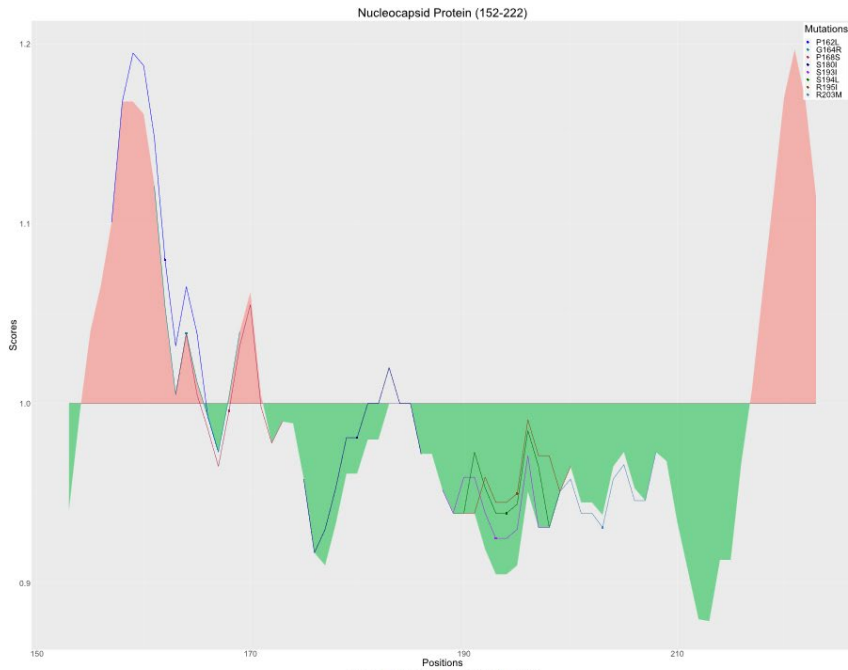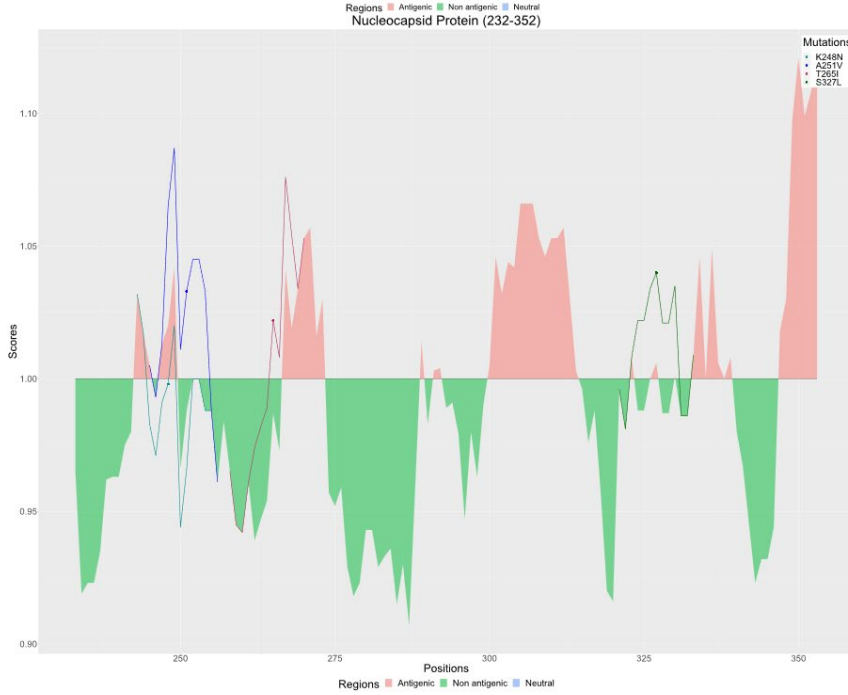

ORF1a Protein (2200-2648)

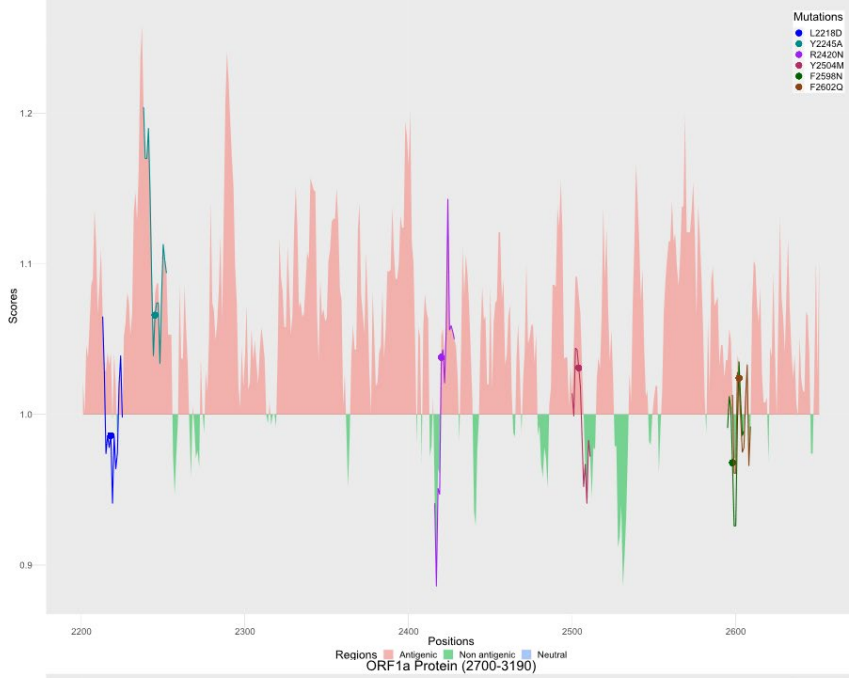

ORF1a Protein (2700-3190)

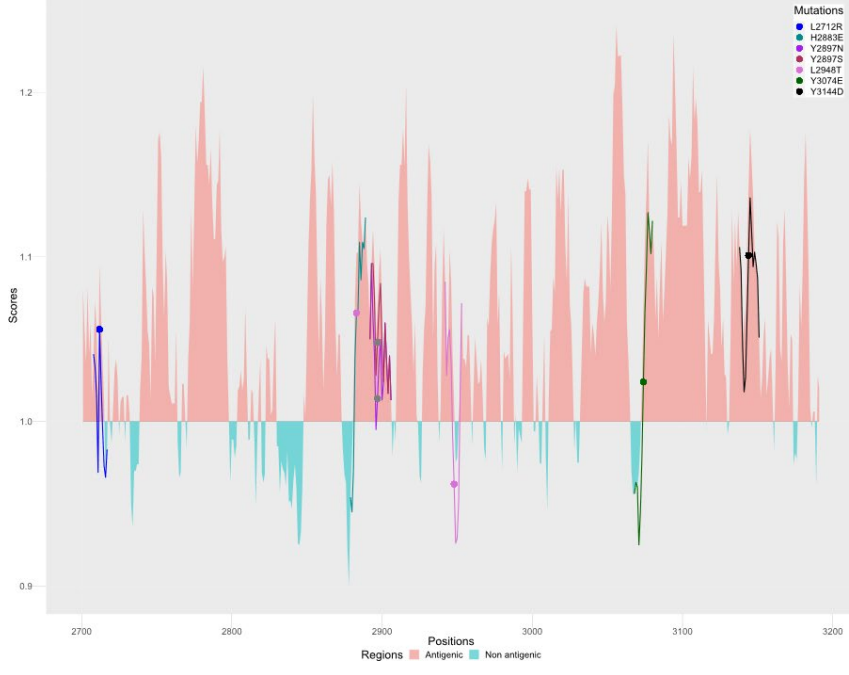

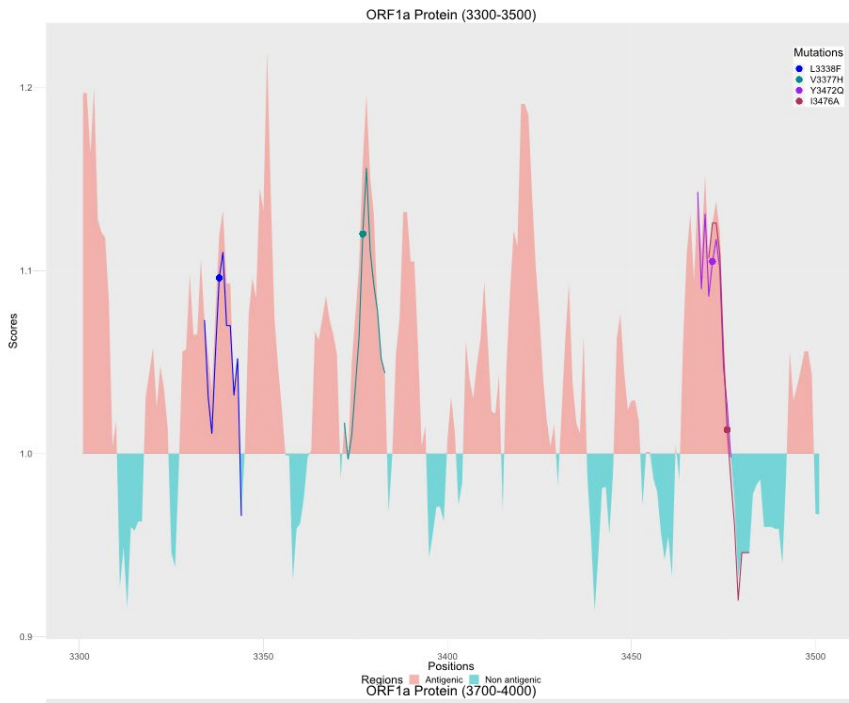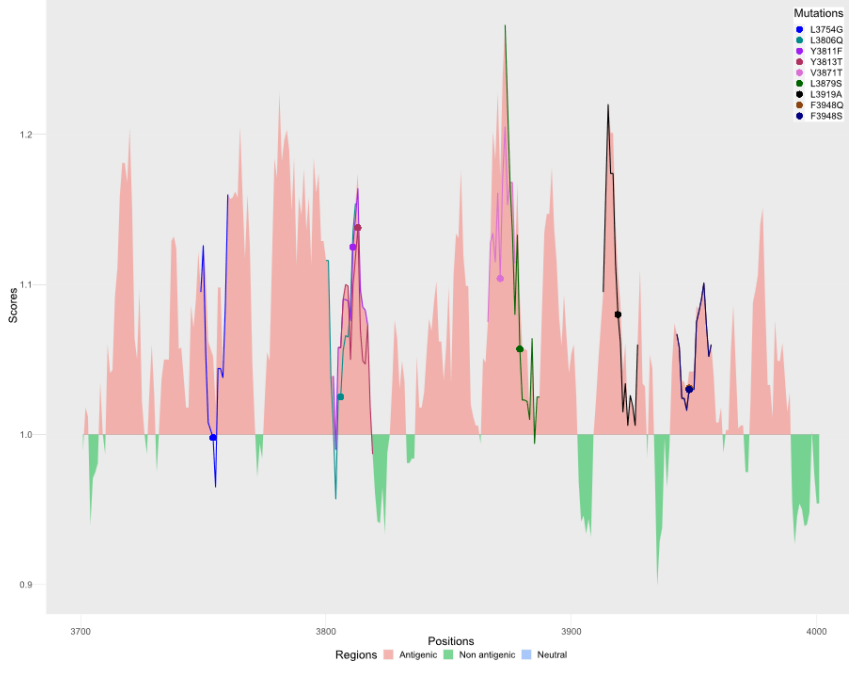

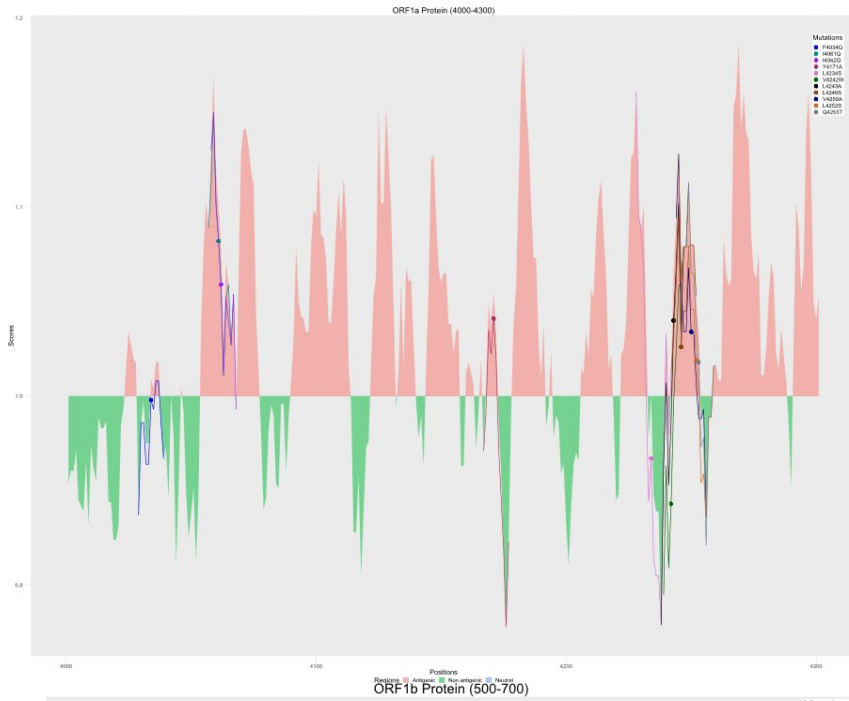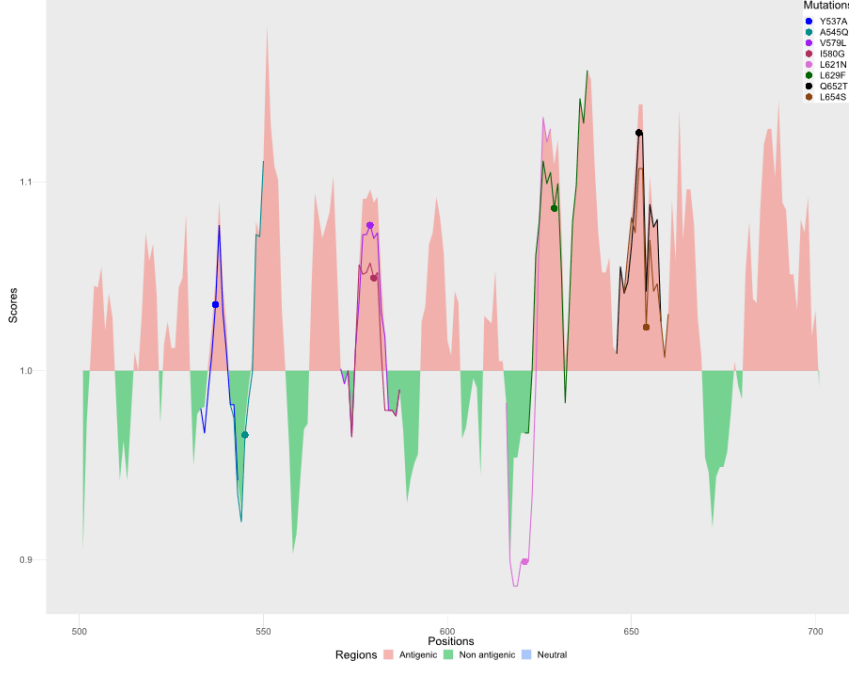

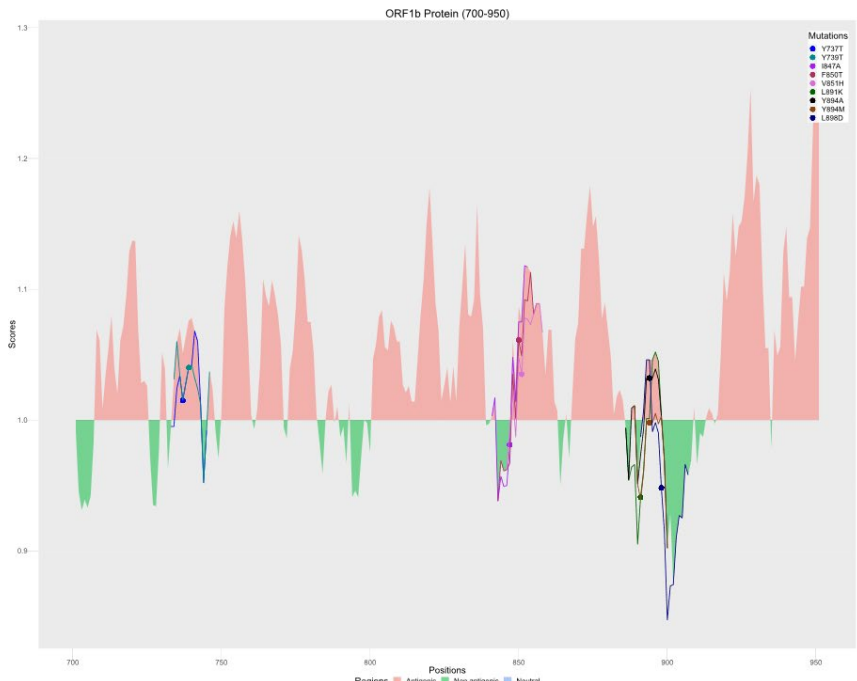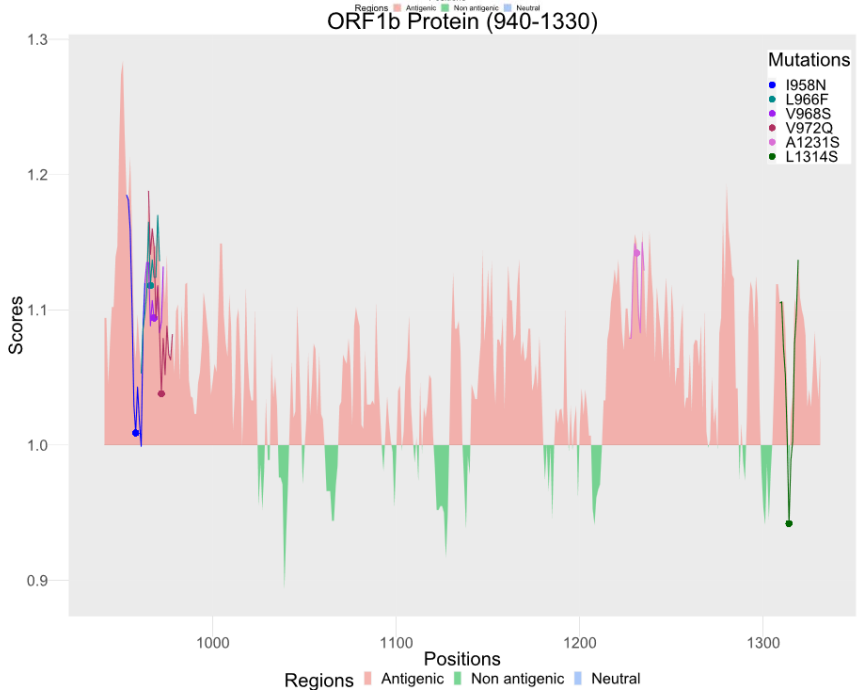

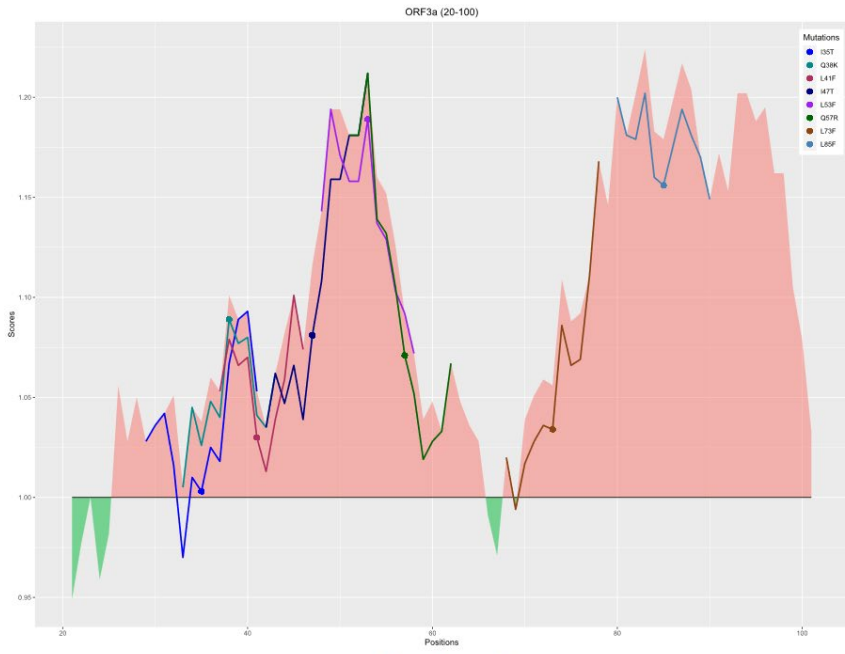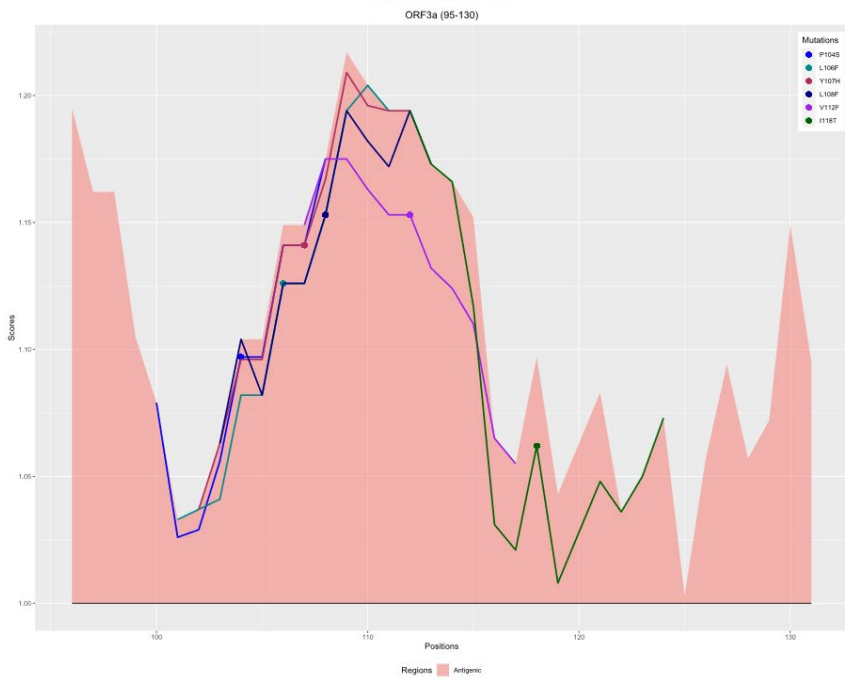



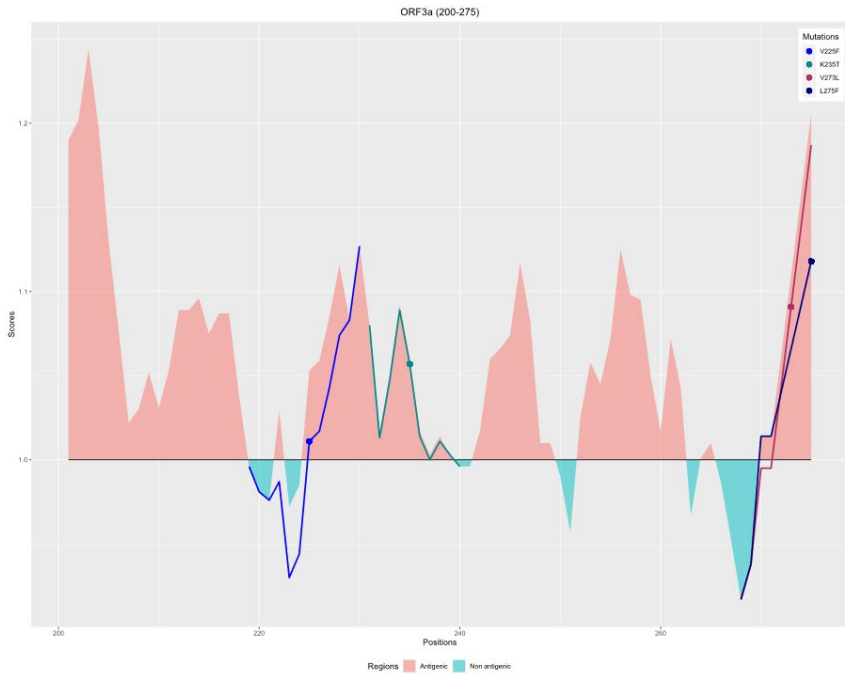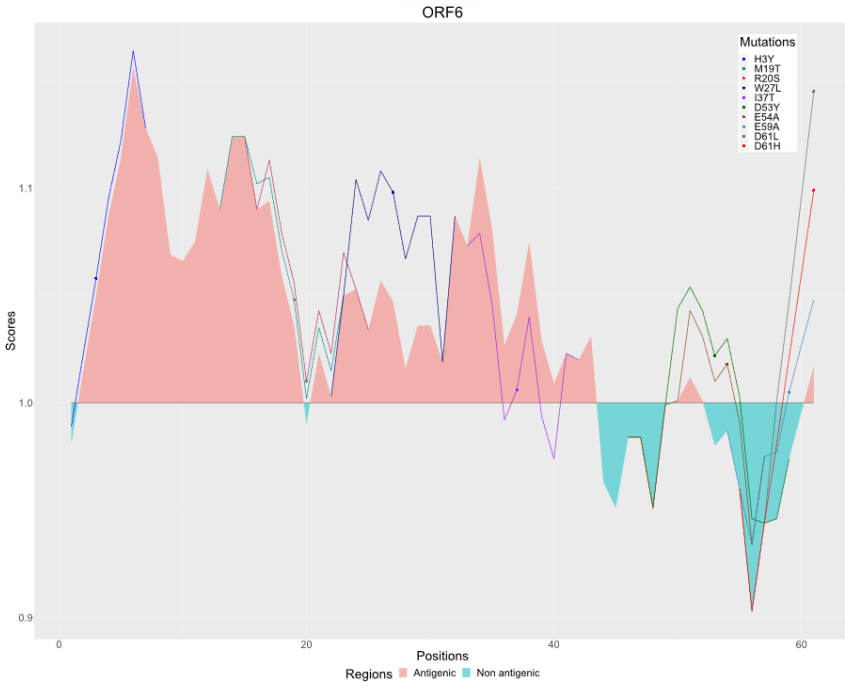

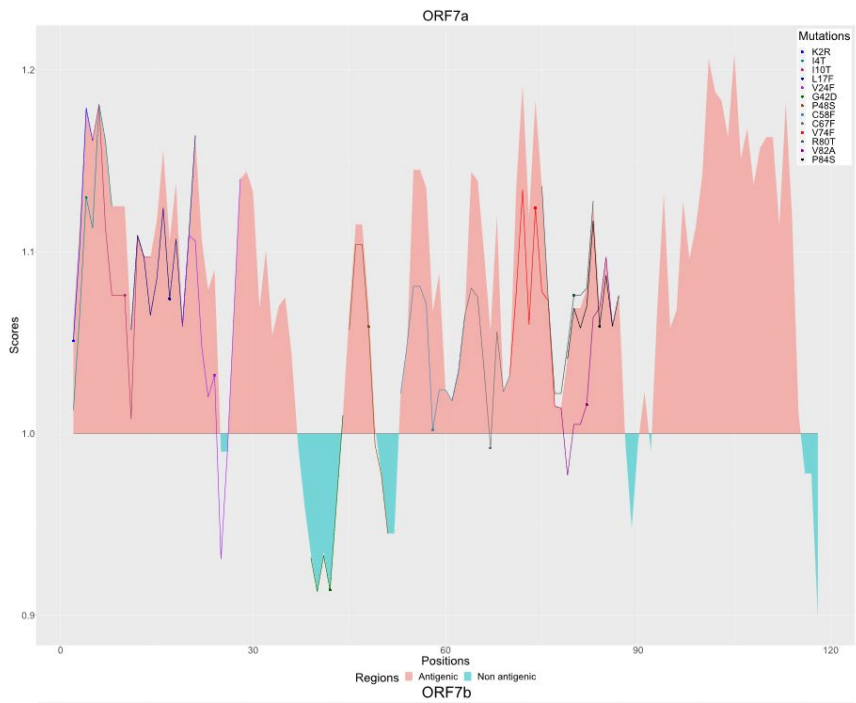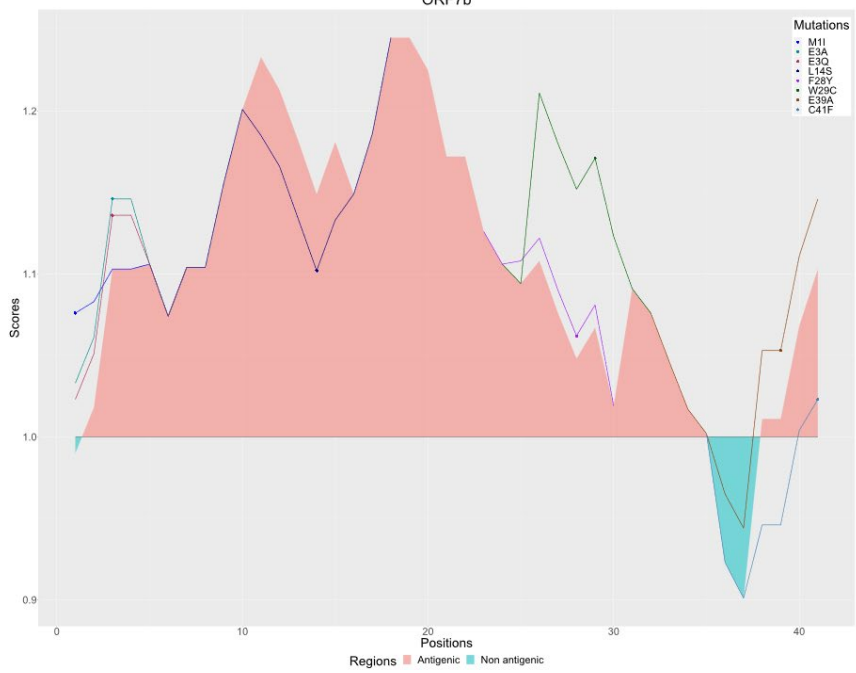

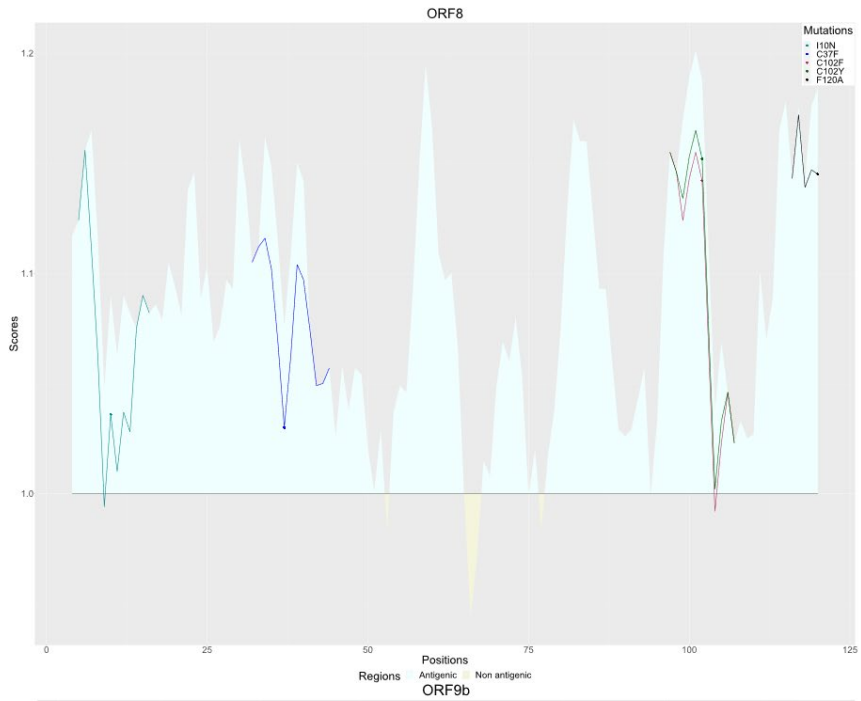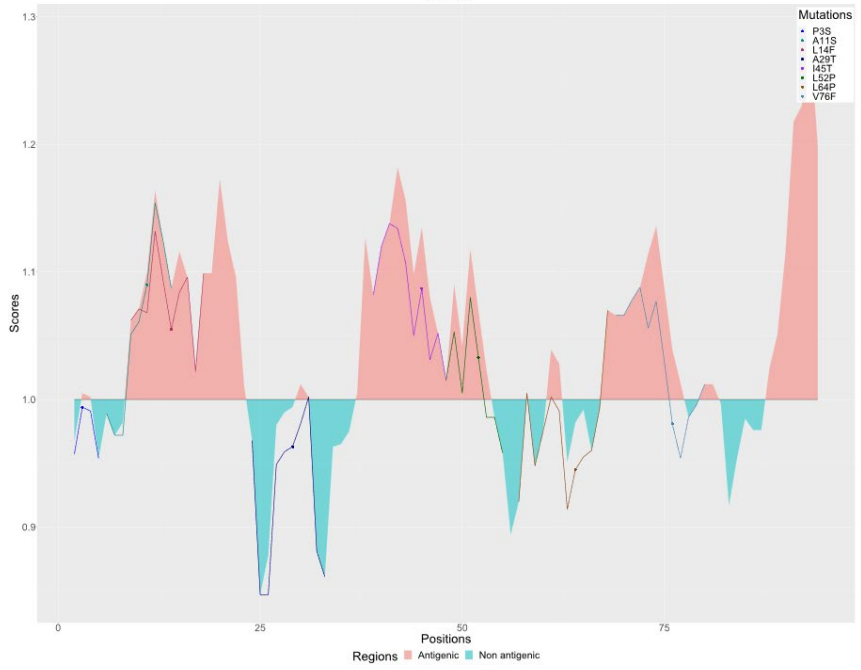

Spike Protein (100-400)

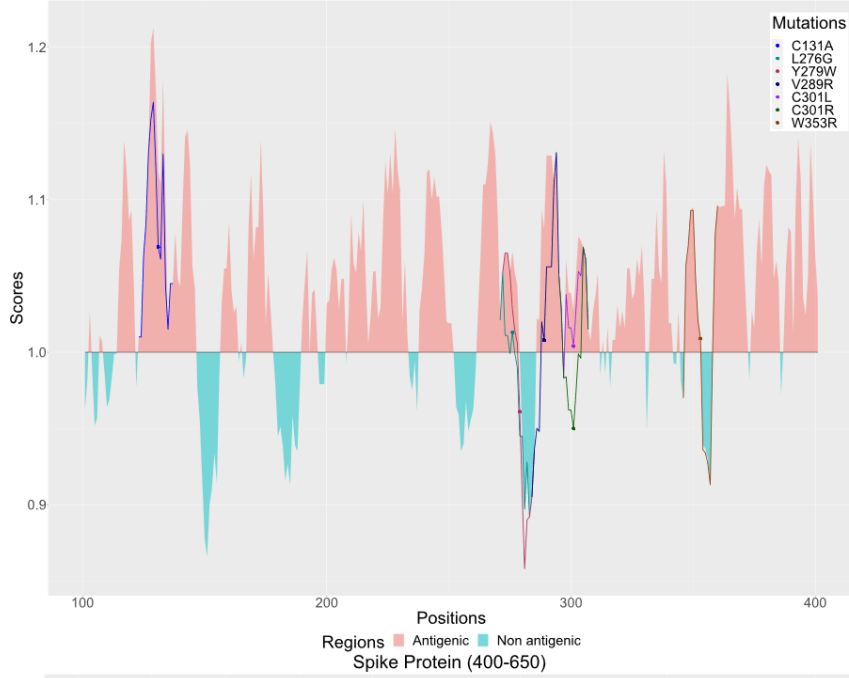

Spike Protein (400-650)

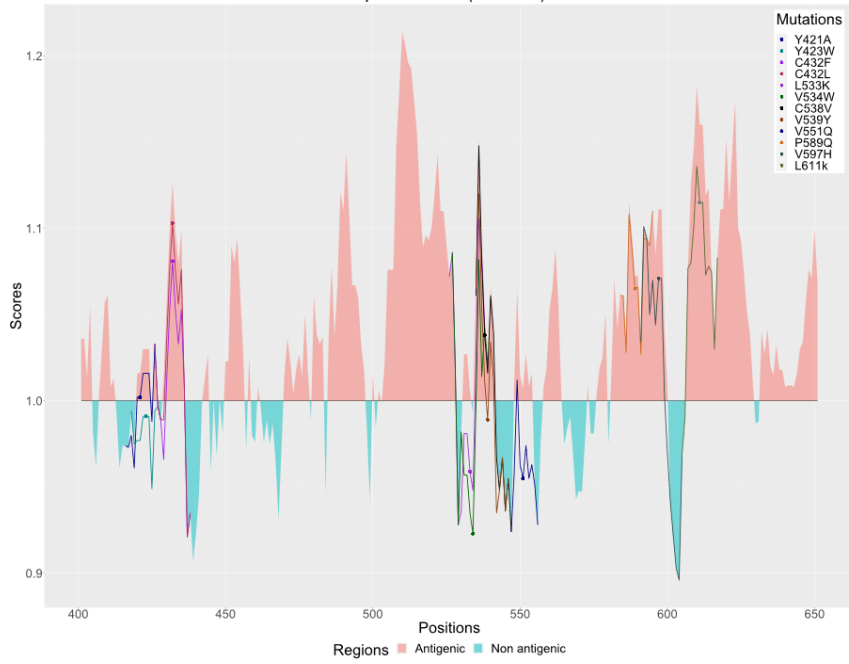

Spike Protein (720-900)

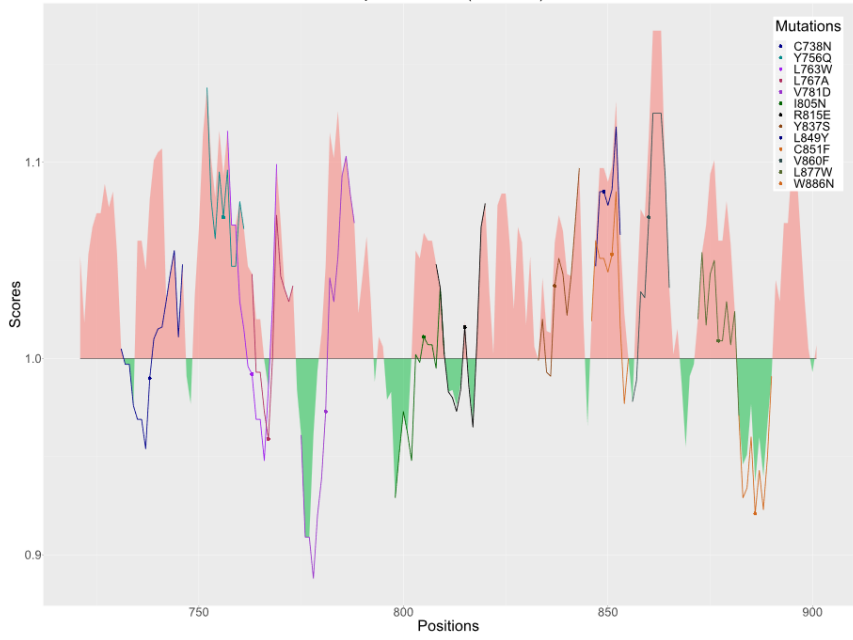

Regions Antigenic Non antigenic Neutral  
Spike Protein (900-1050)

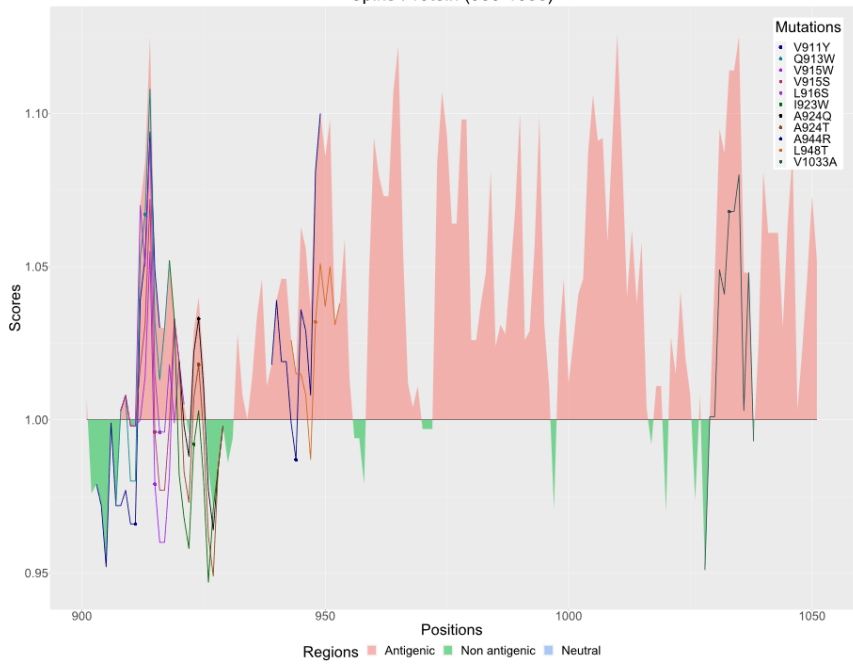

### Spike Protein (1150-1280)

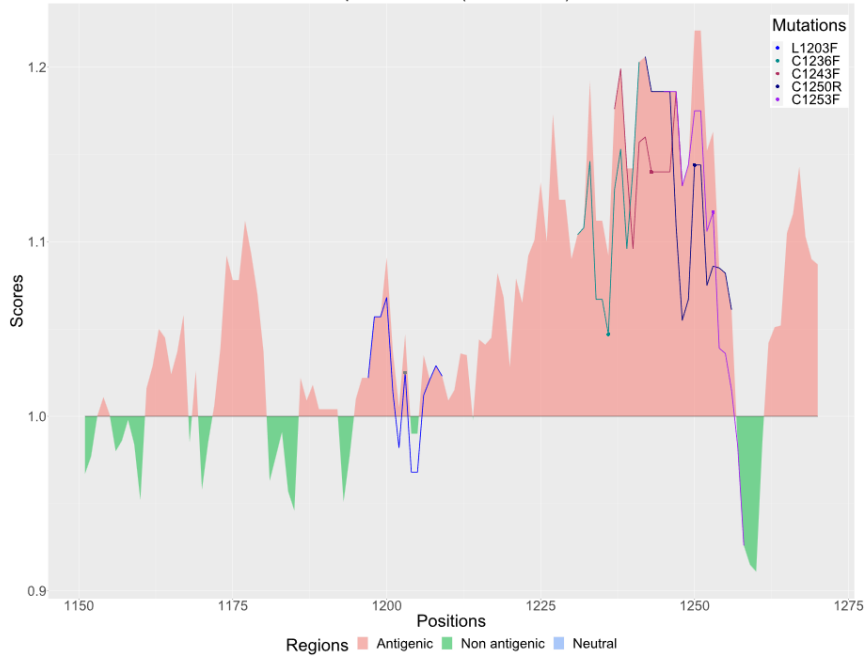

Supplement: Image1.pdf [file Image1.pdf]
