# Supplementary material for: Variant-specific deleterious mutations in the SARS-CoV-2 genome reveal immune responses and potentials for prophylactic vaccine development
Source: PubMed Central journal article supplement (PMC9941545; doi:10.3389/fphar.2023.1090717), 2023-02-07

# Effect of missense mutation on protein-protein interaction for Delta variant

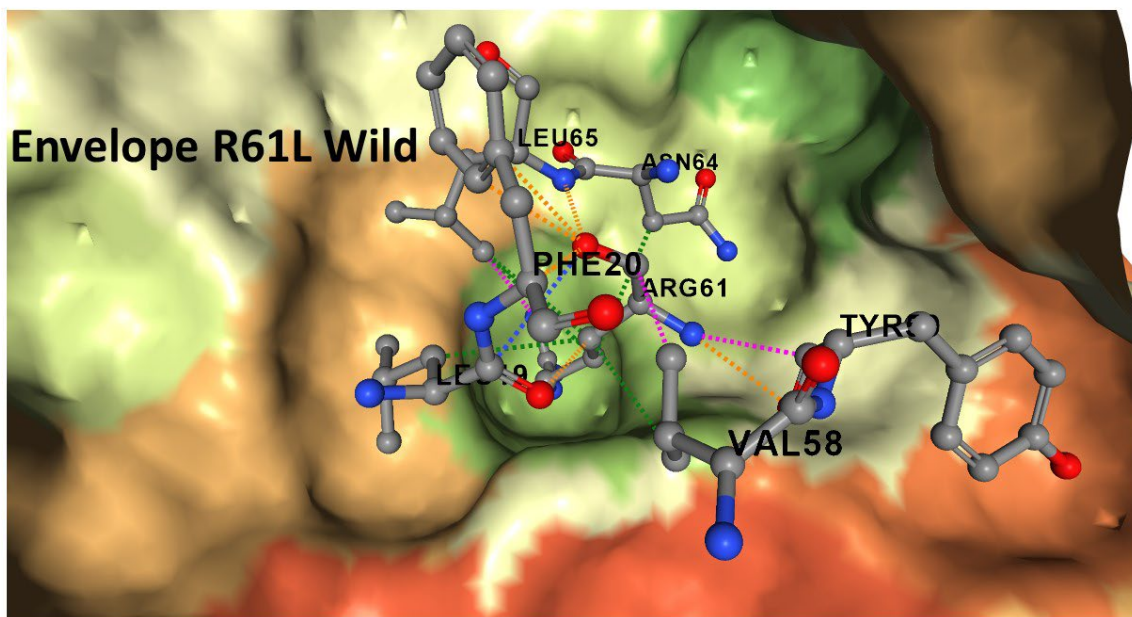

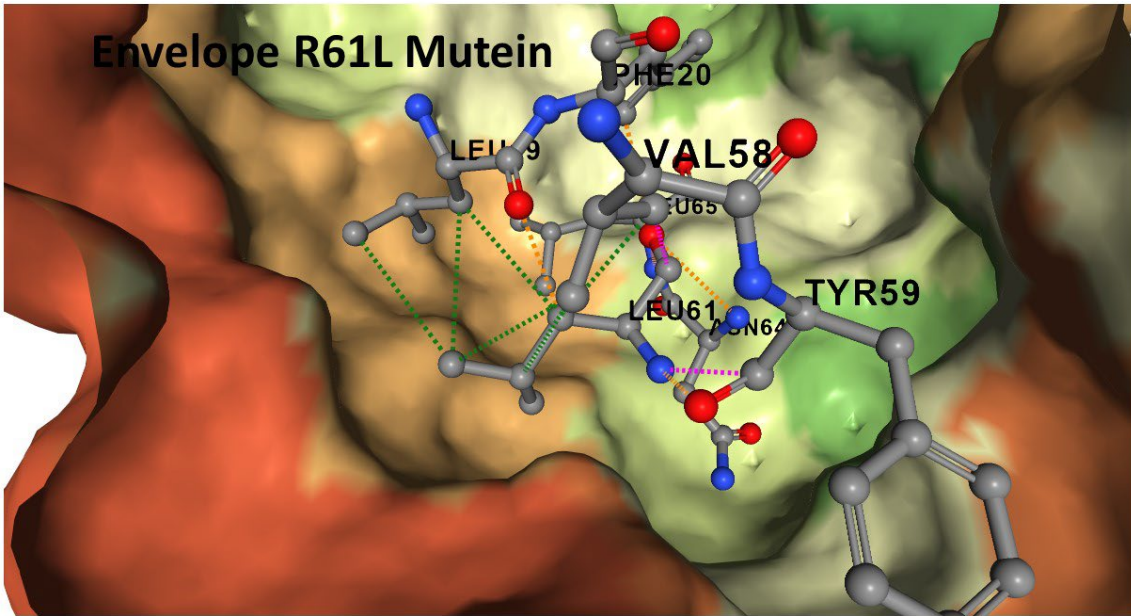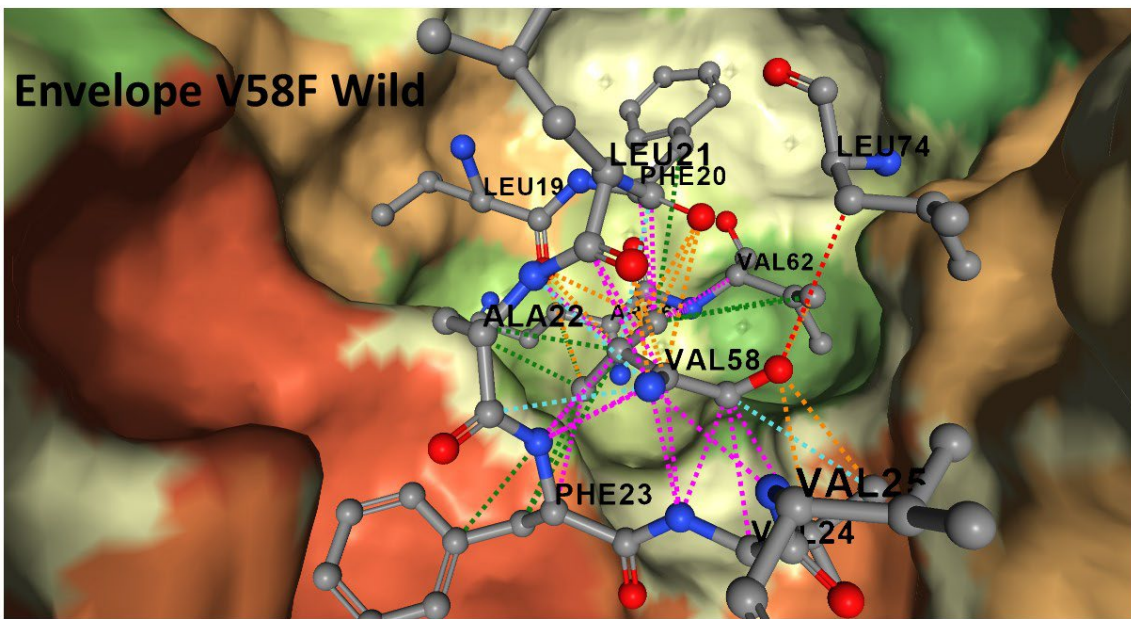



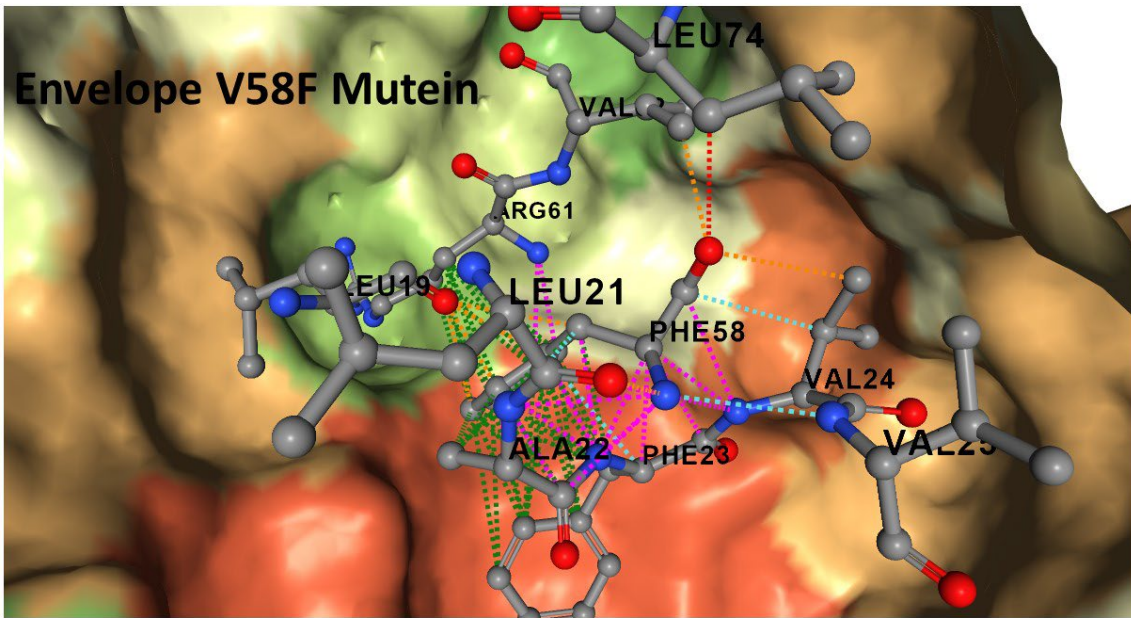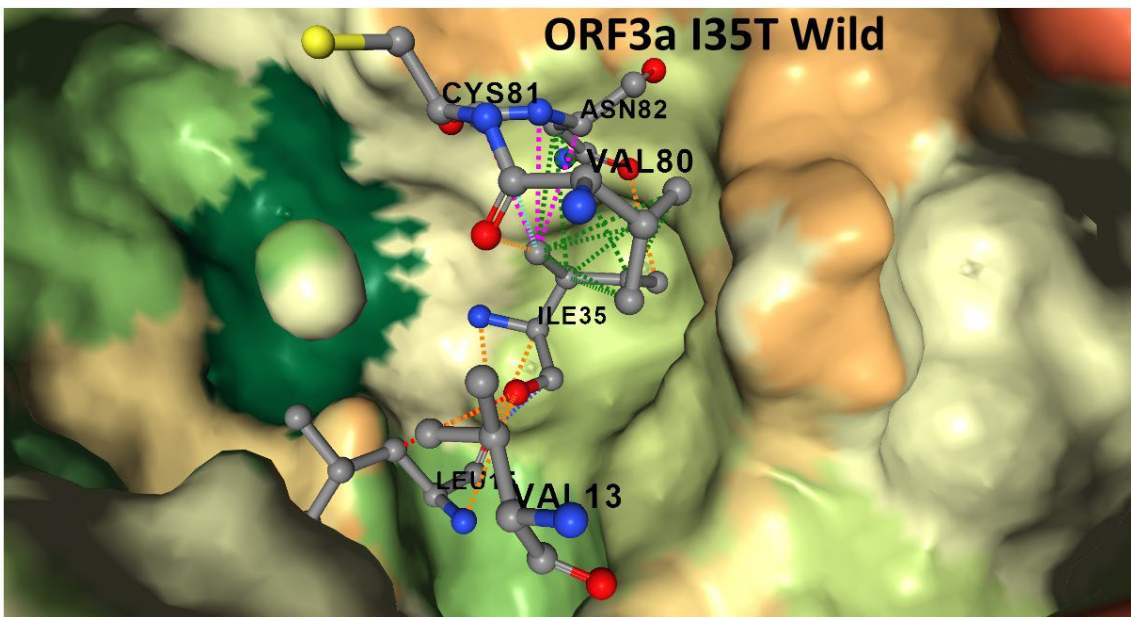

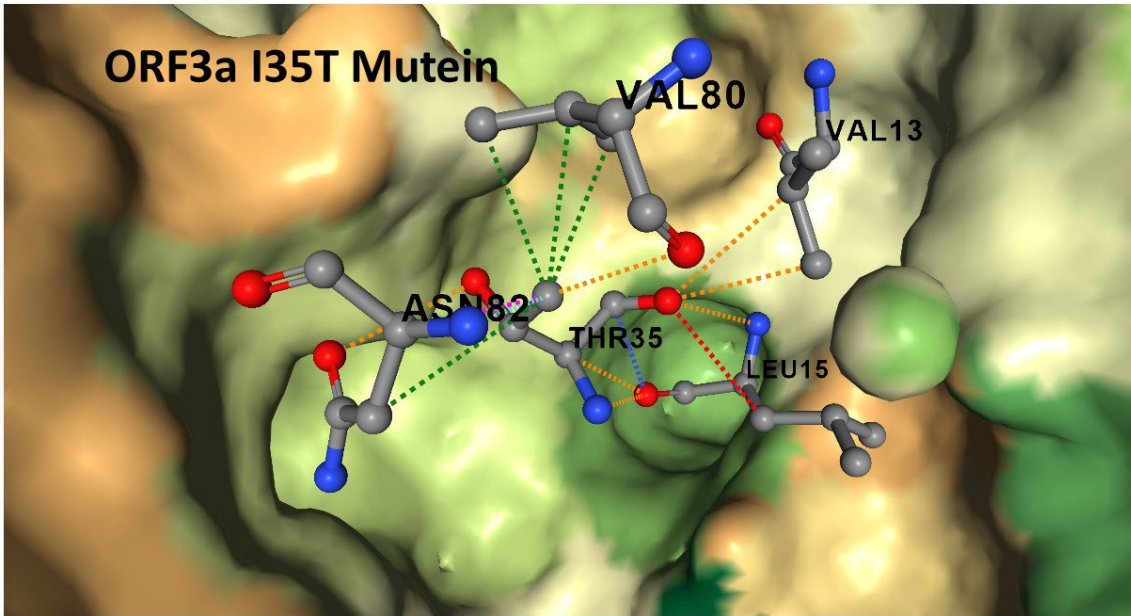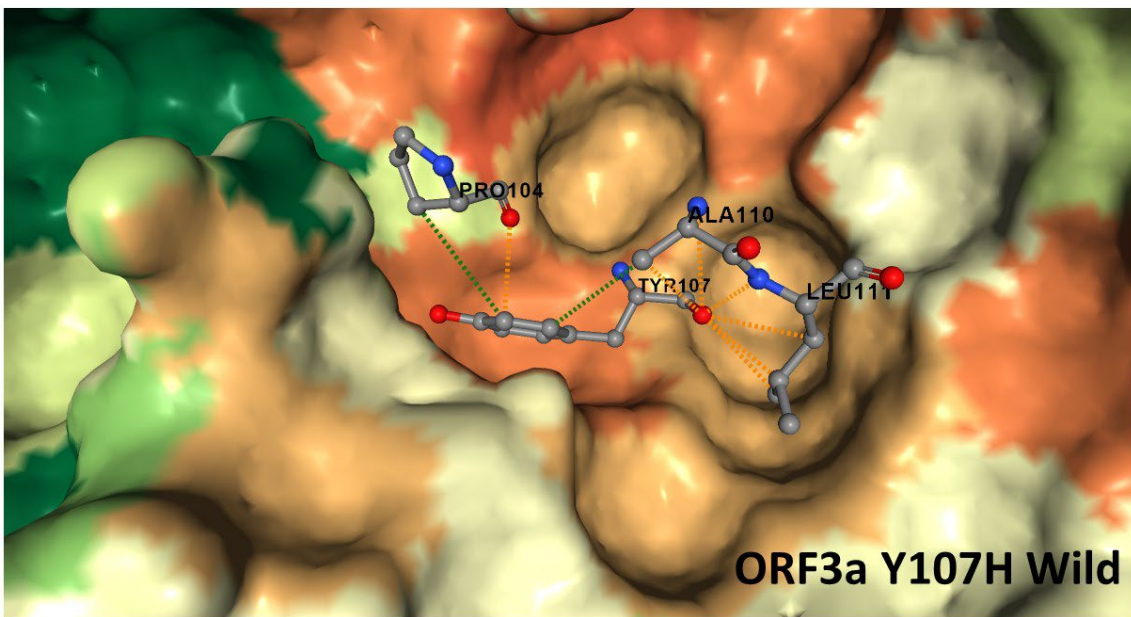



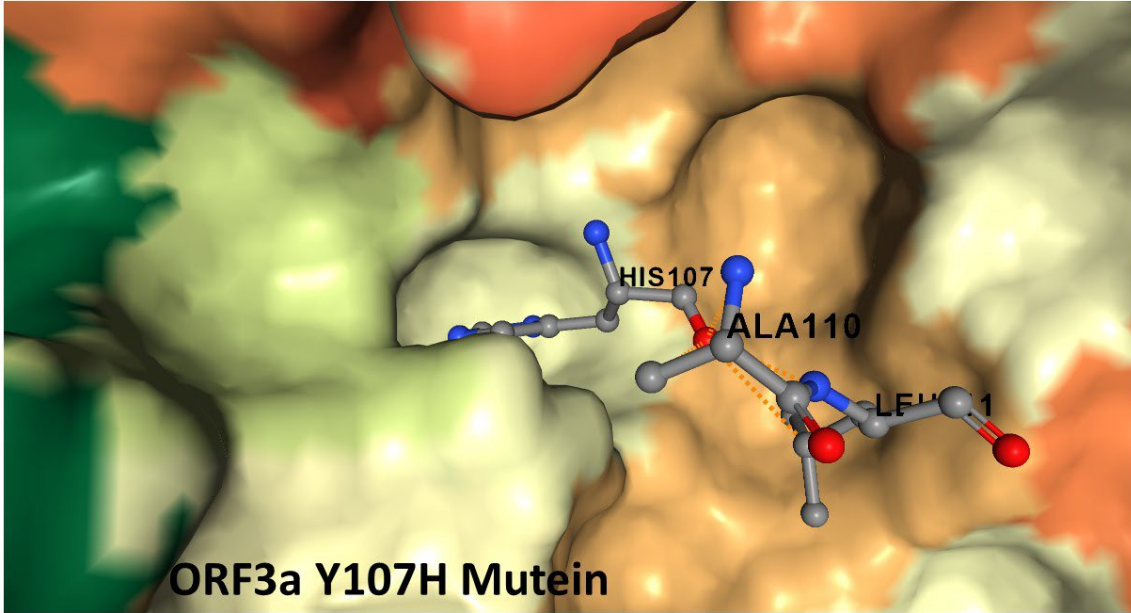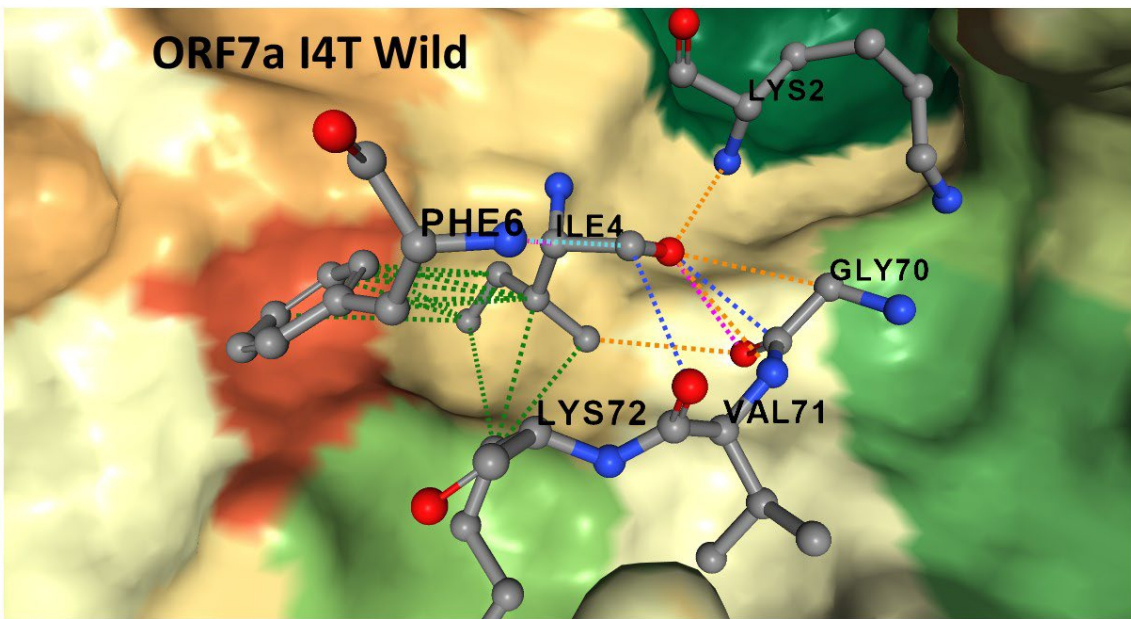

ORF7a I4T Mutein

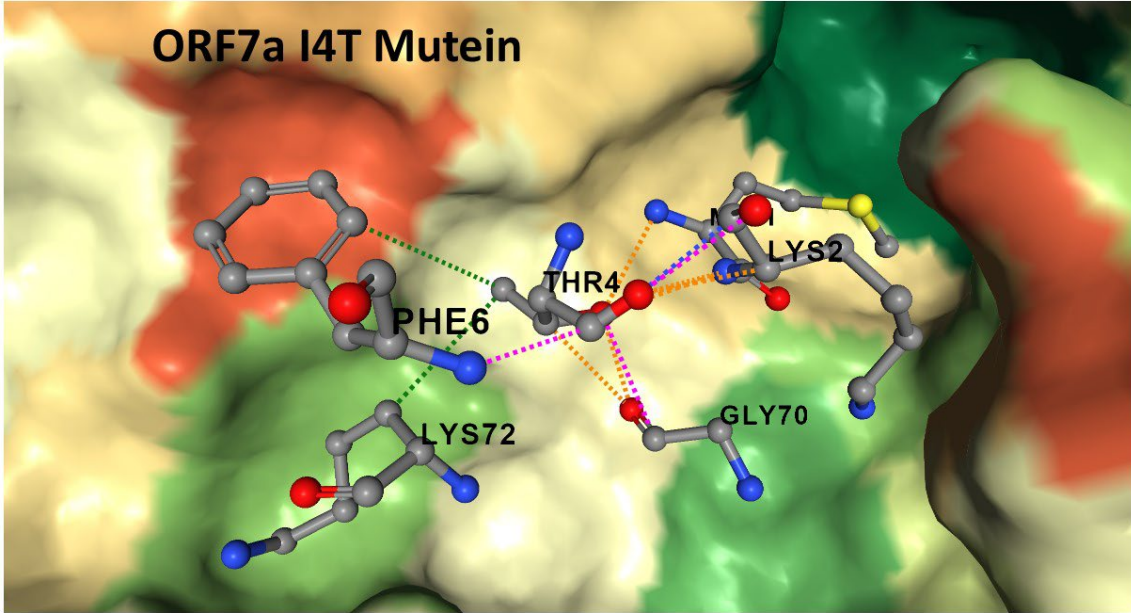

ORF7a I10T Wild

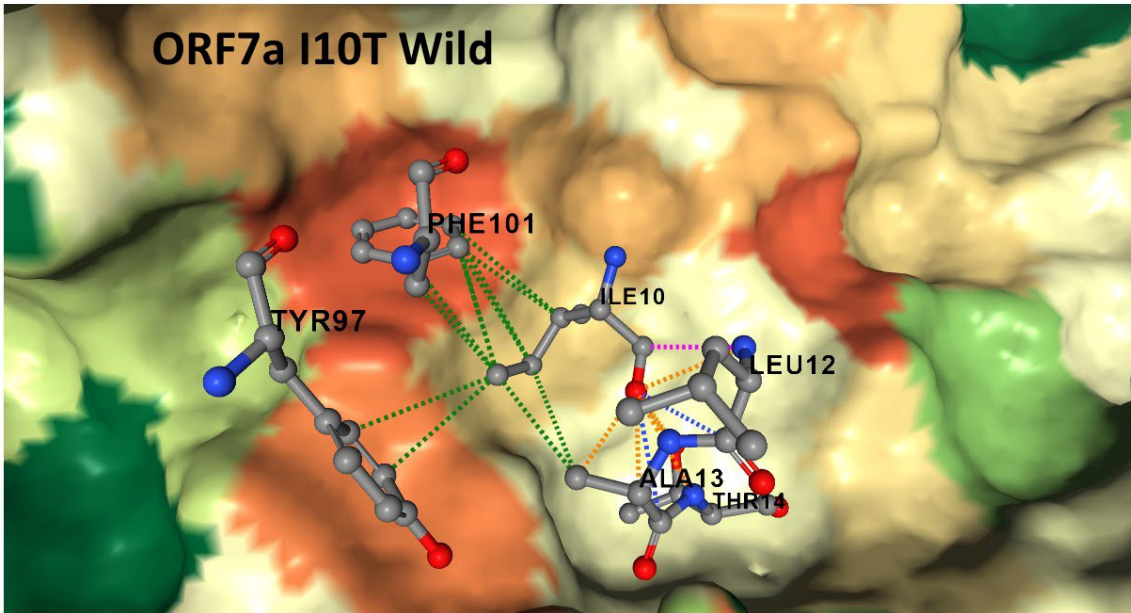



**ORF7a I10T Mutein**

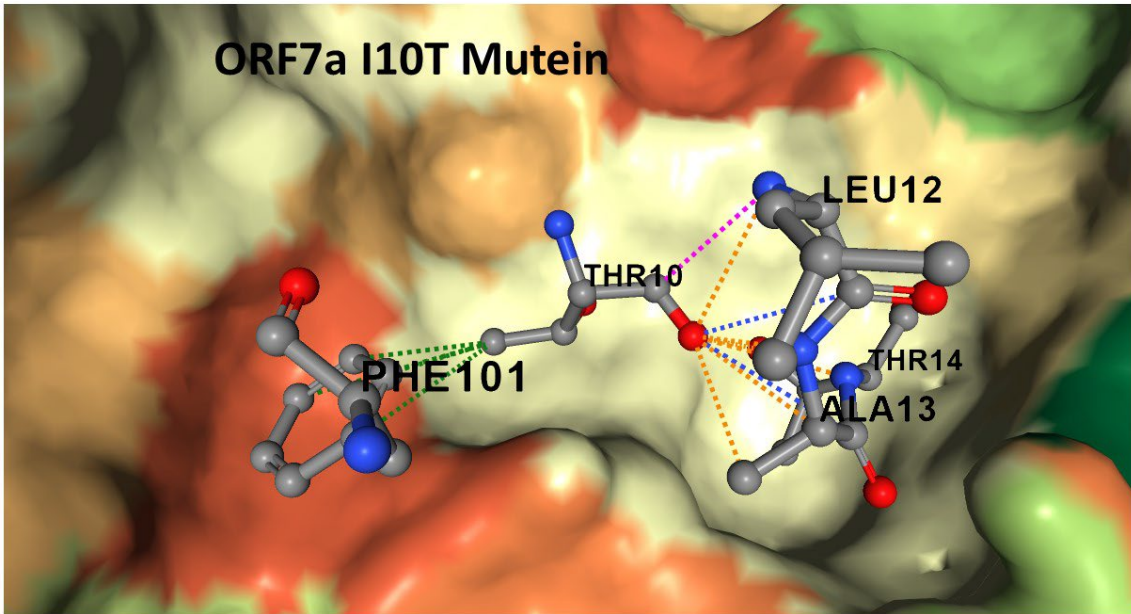

**ORF7a K2R Wild**

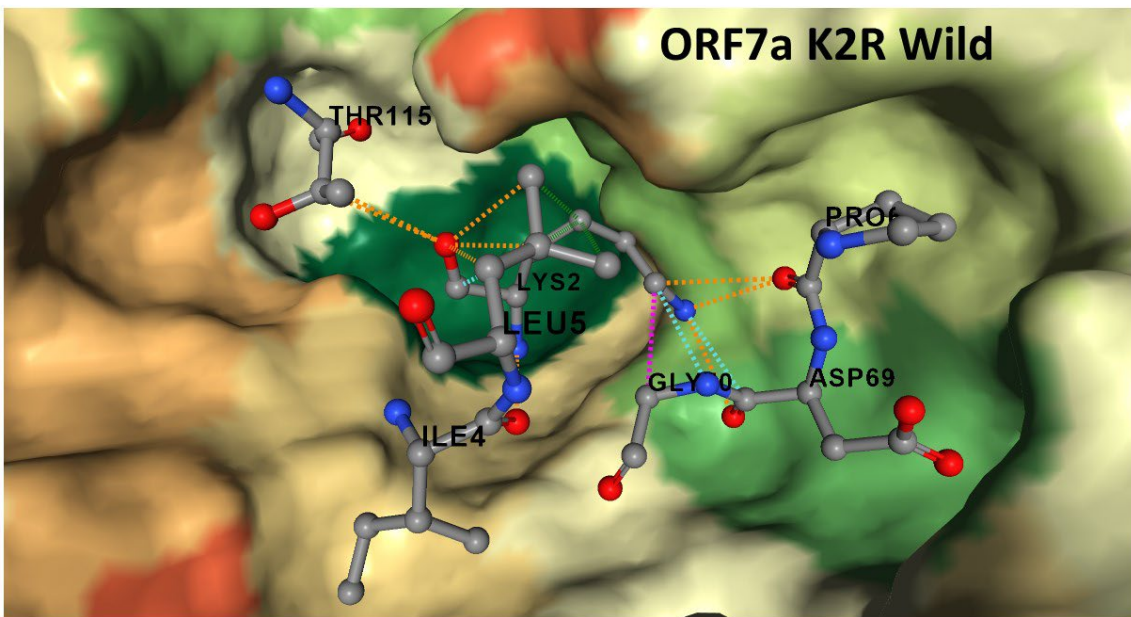

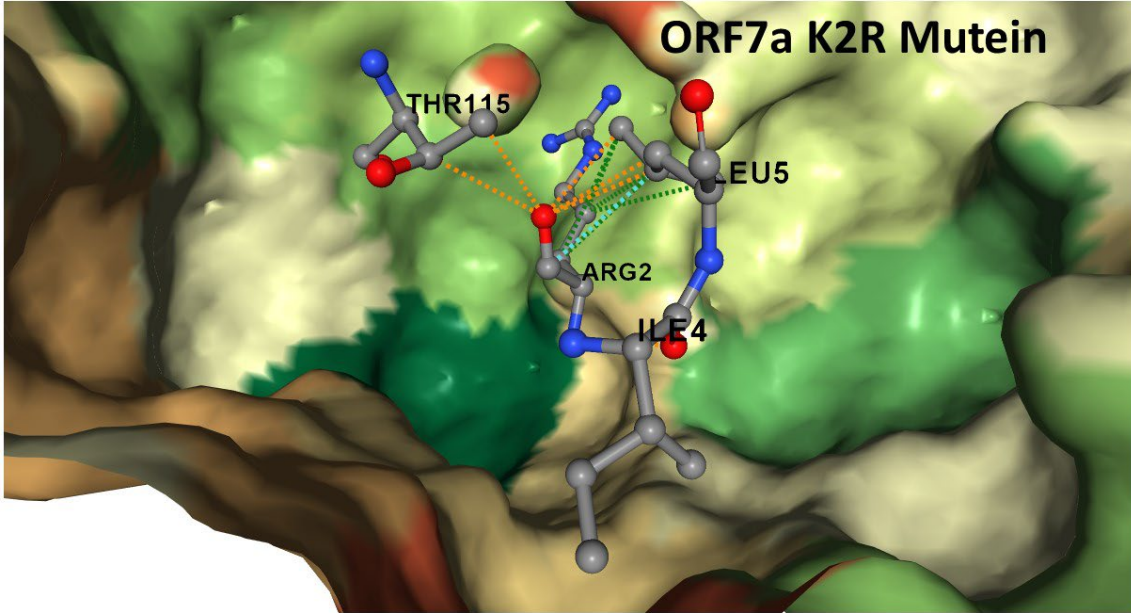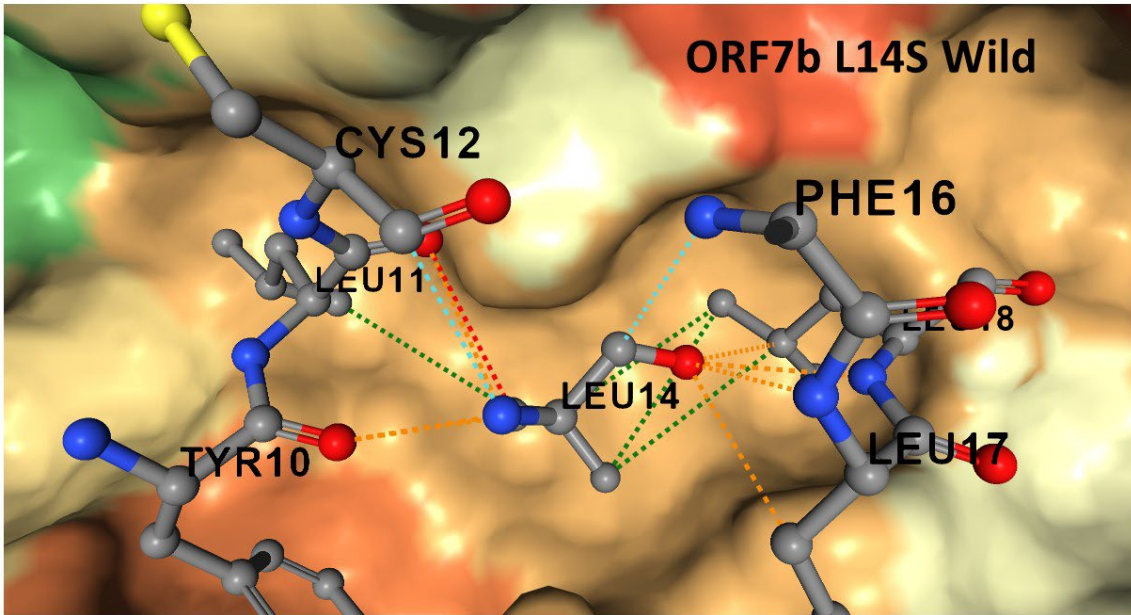



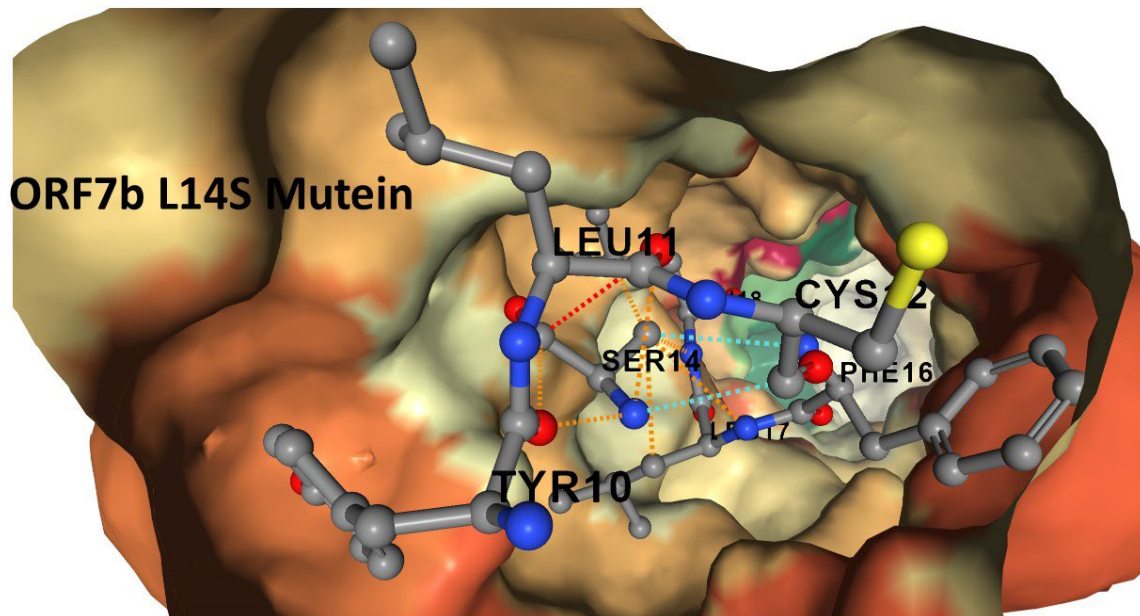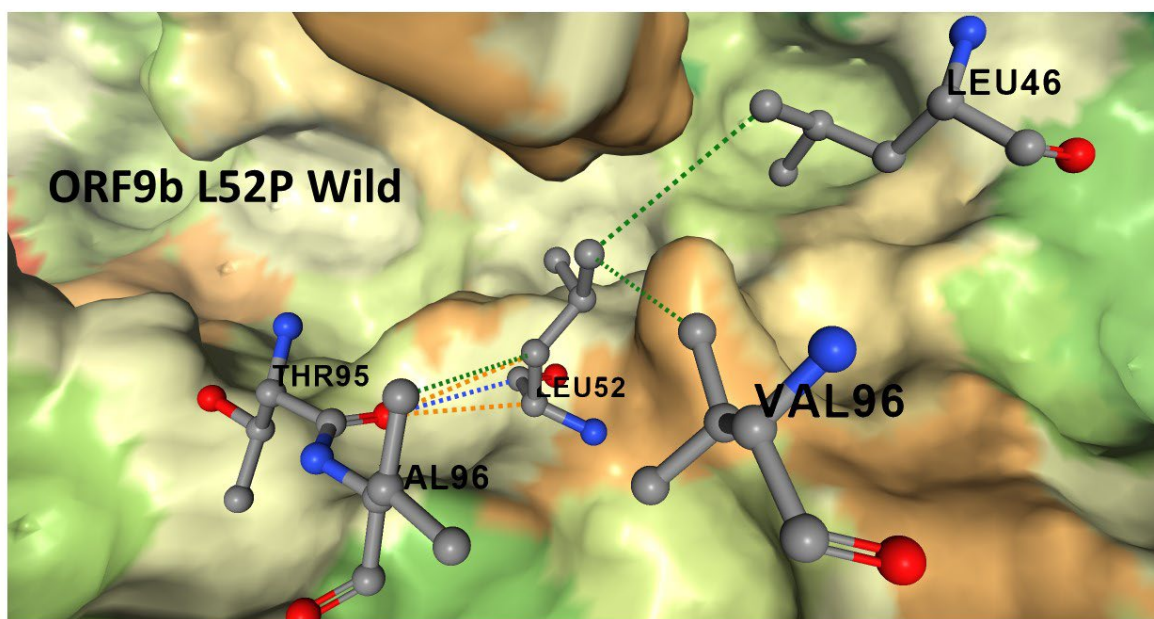

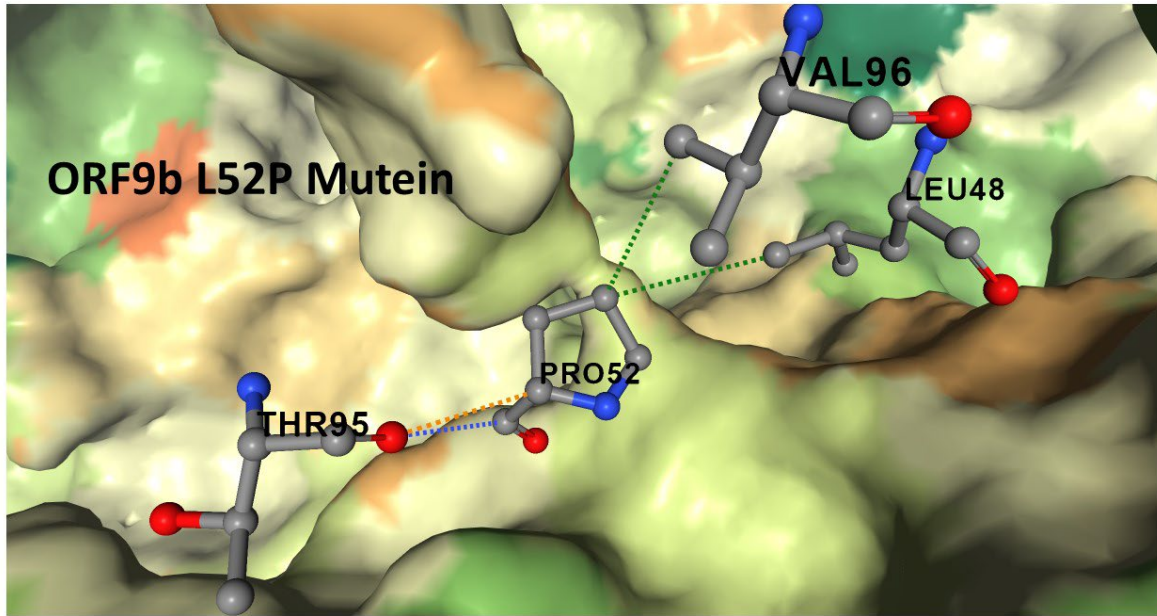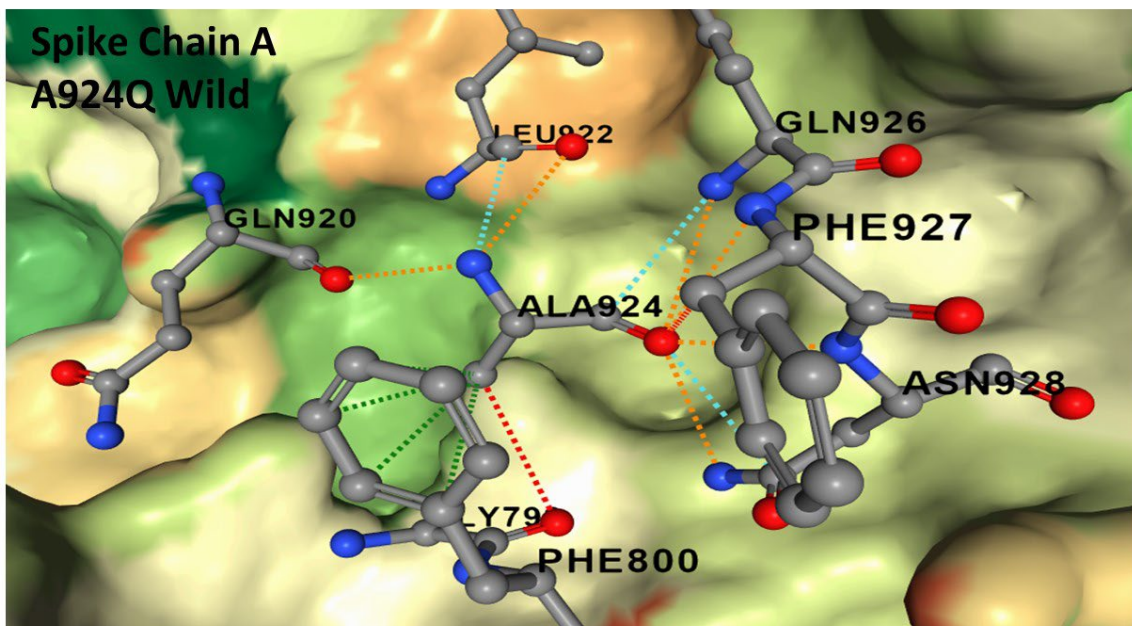



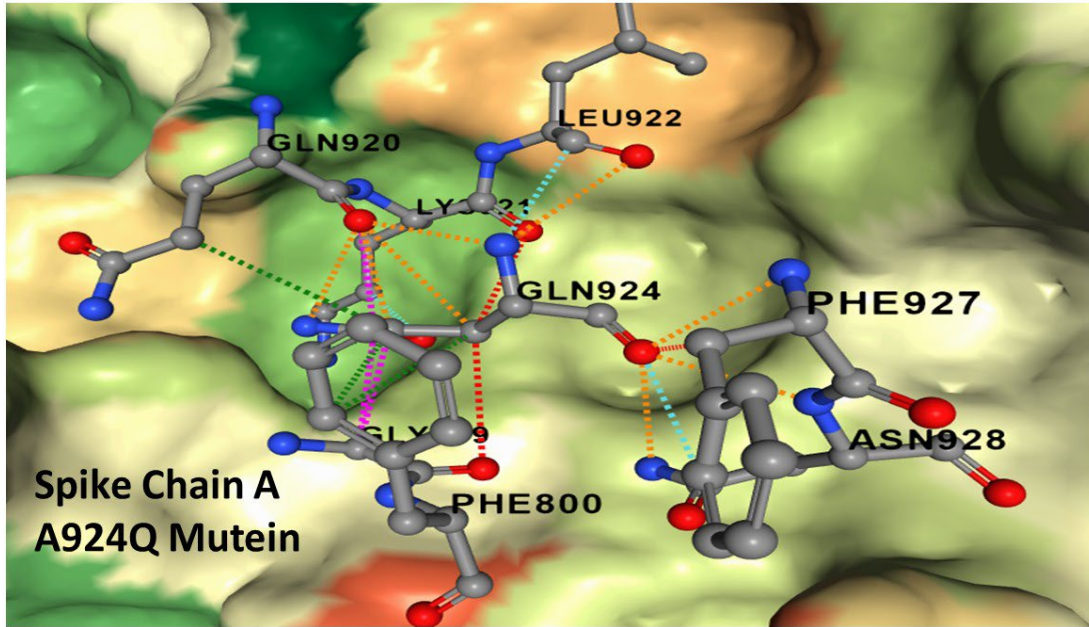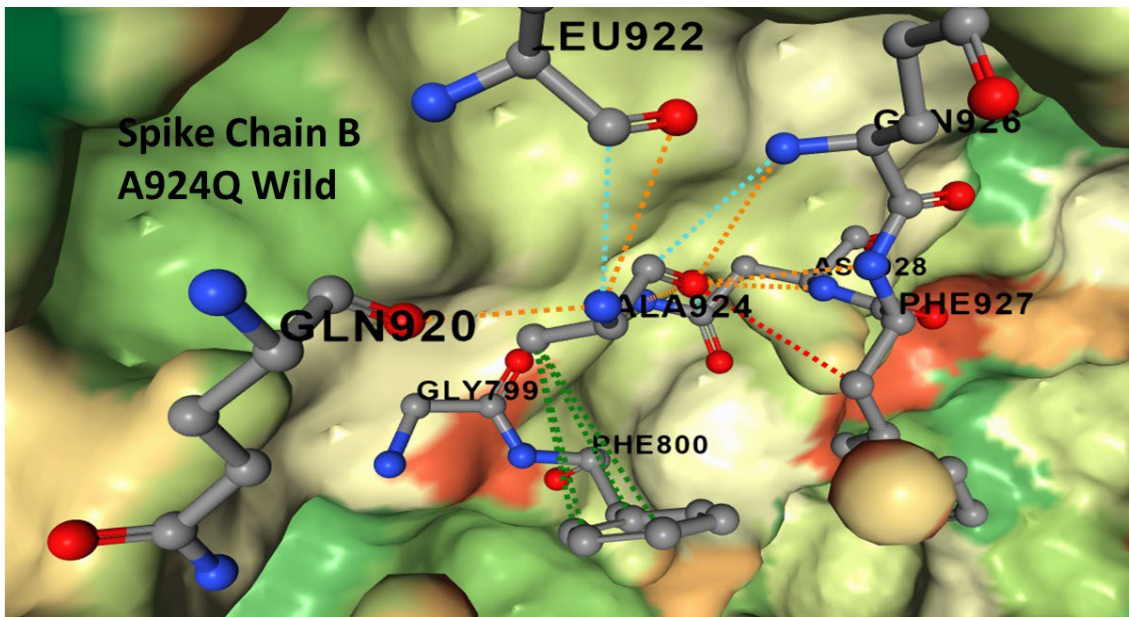

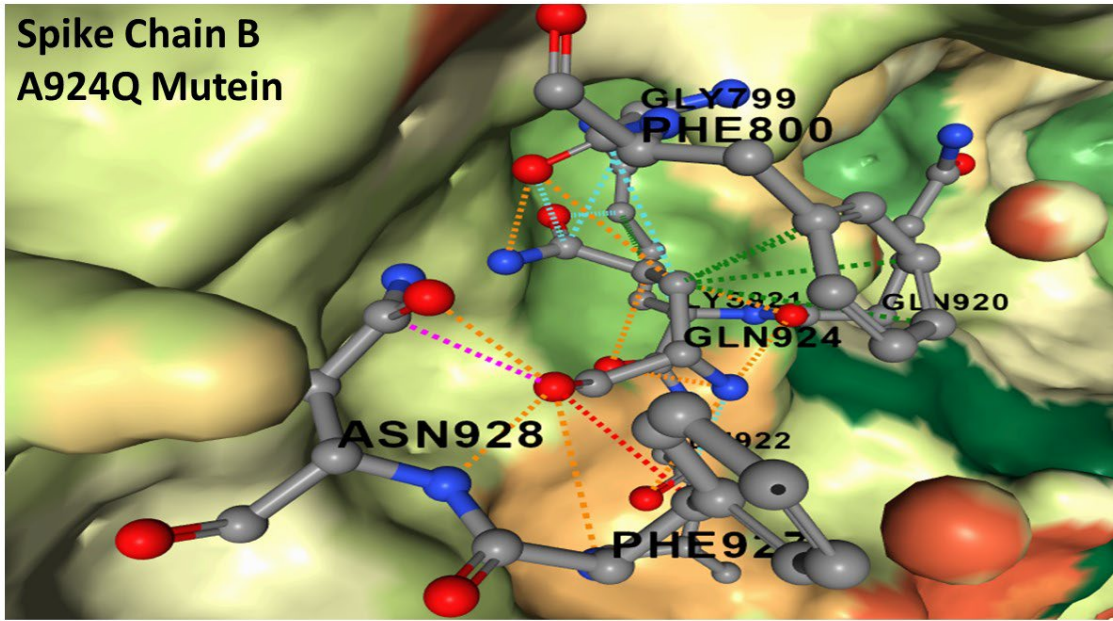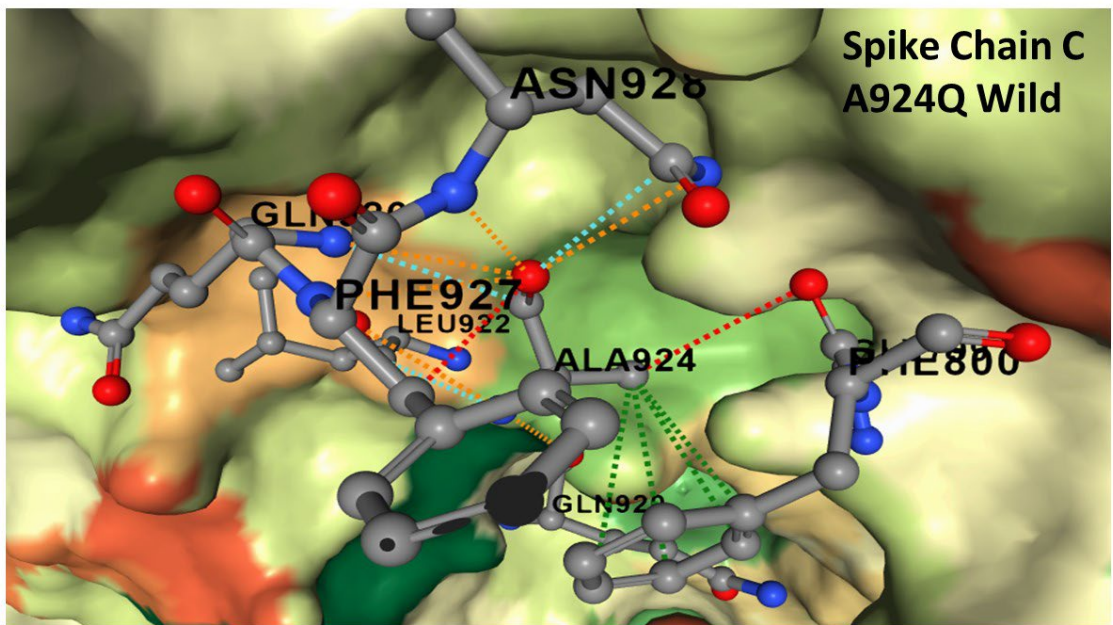



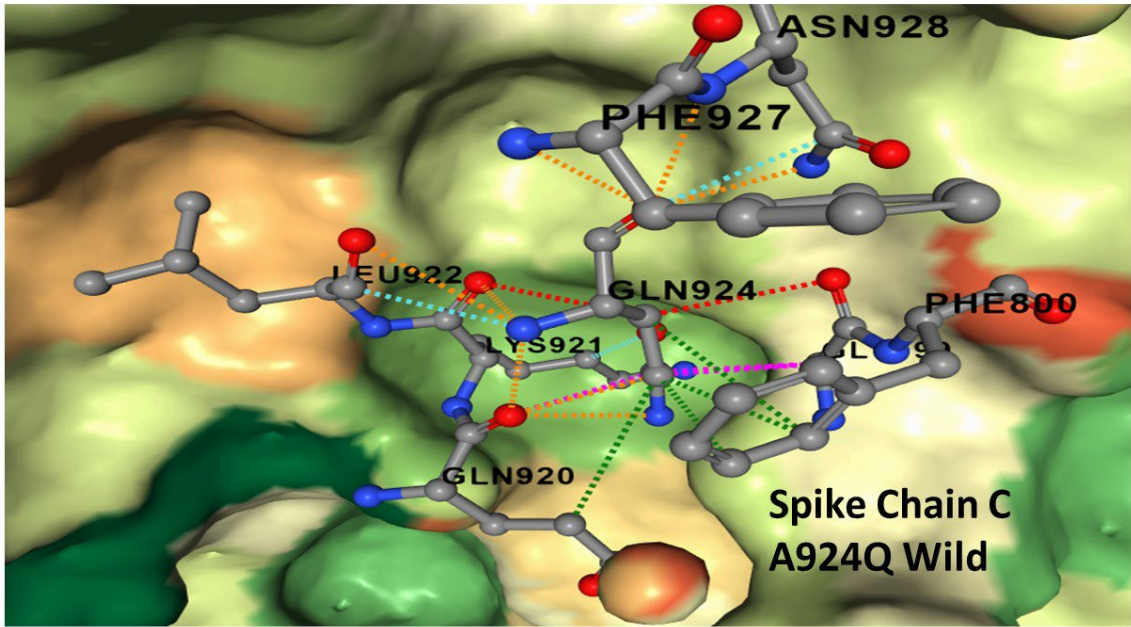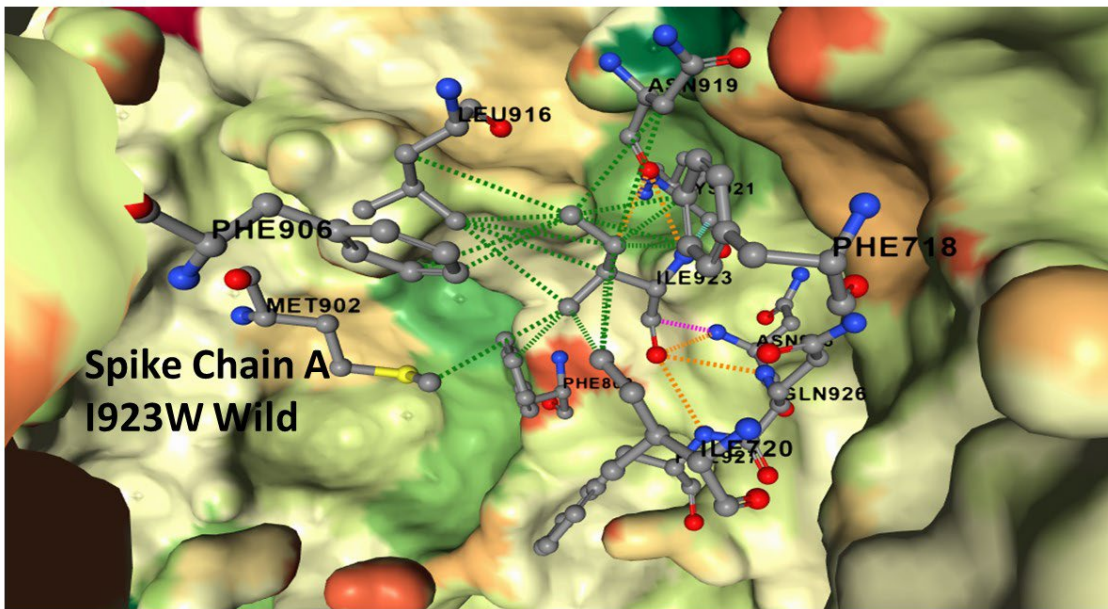

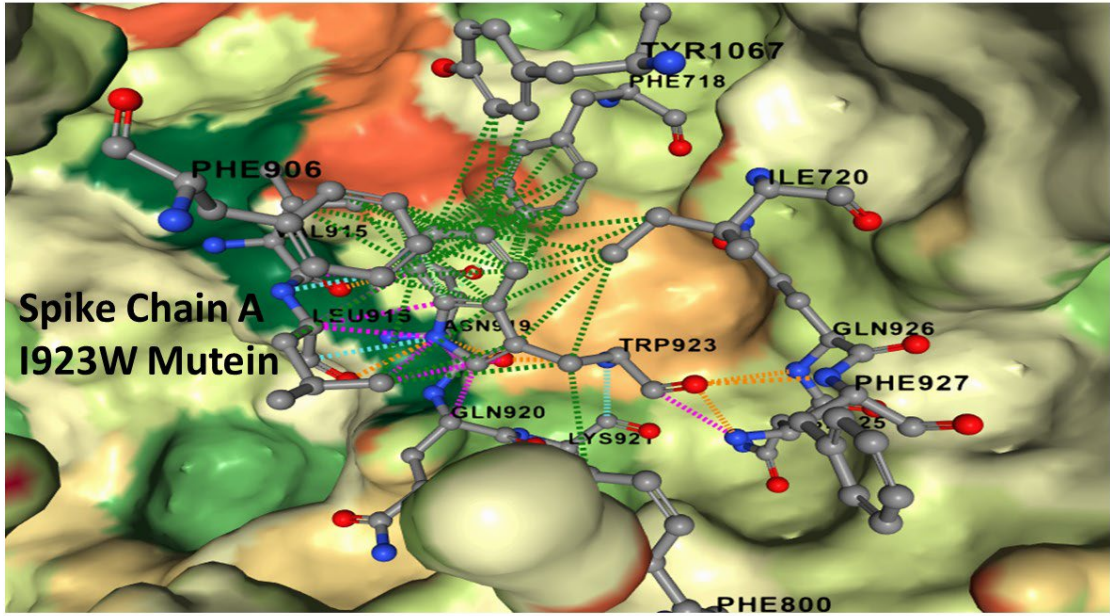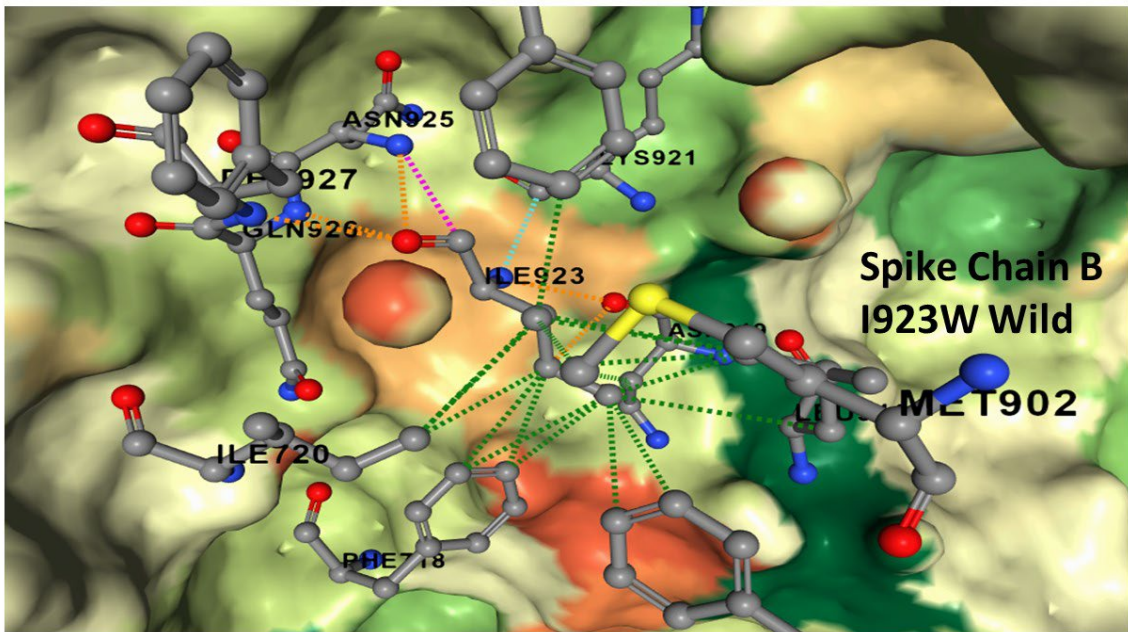



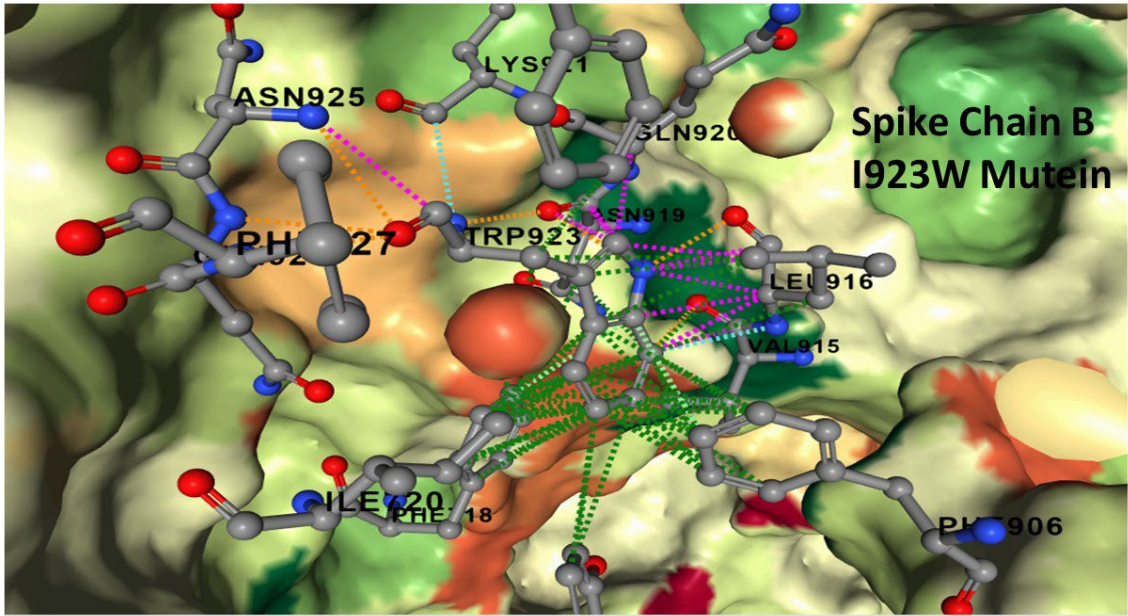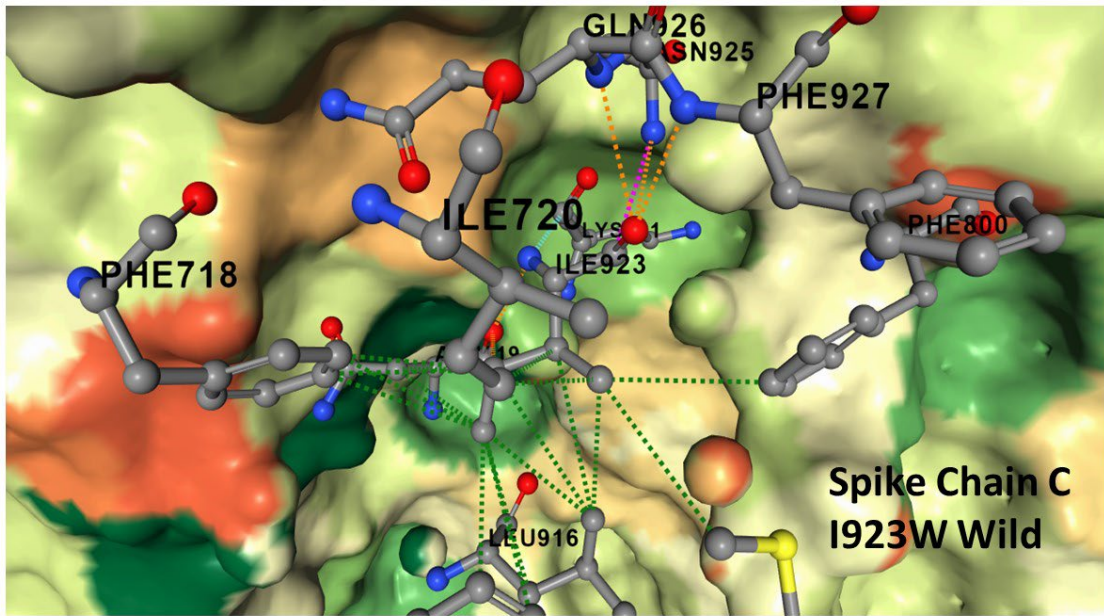

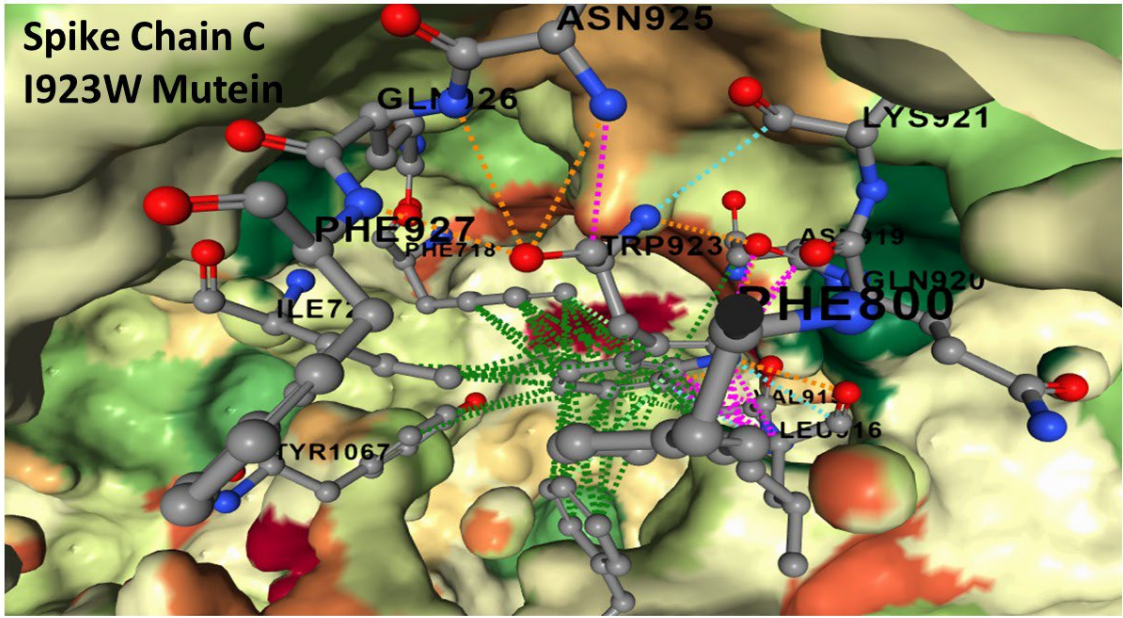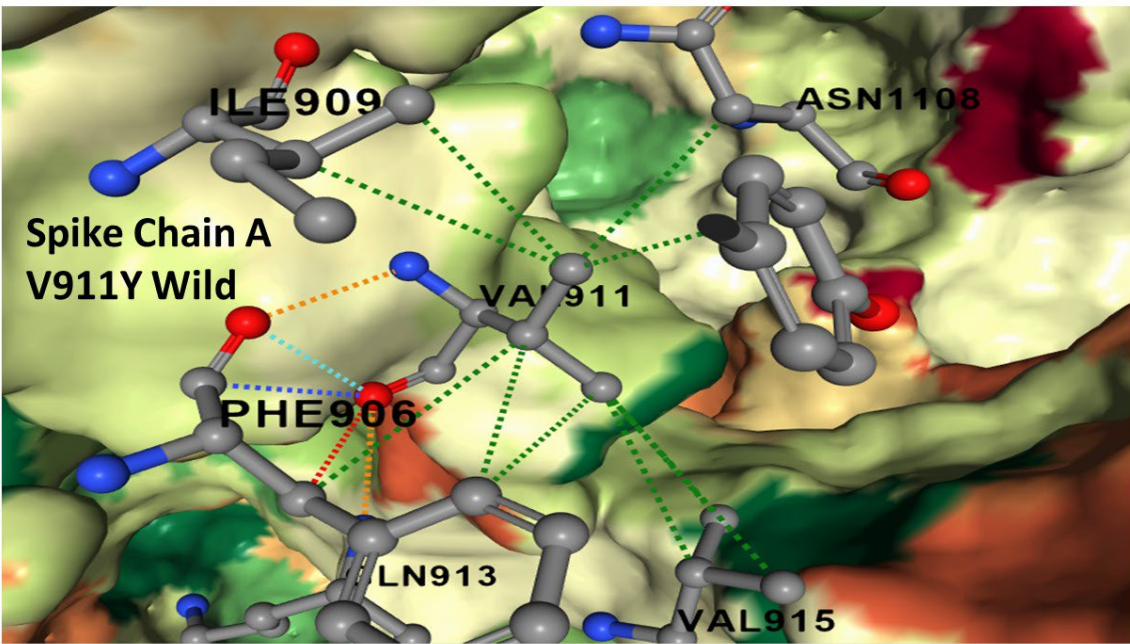



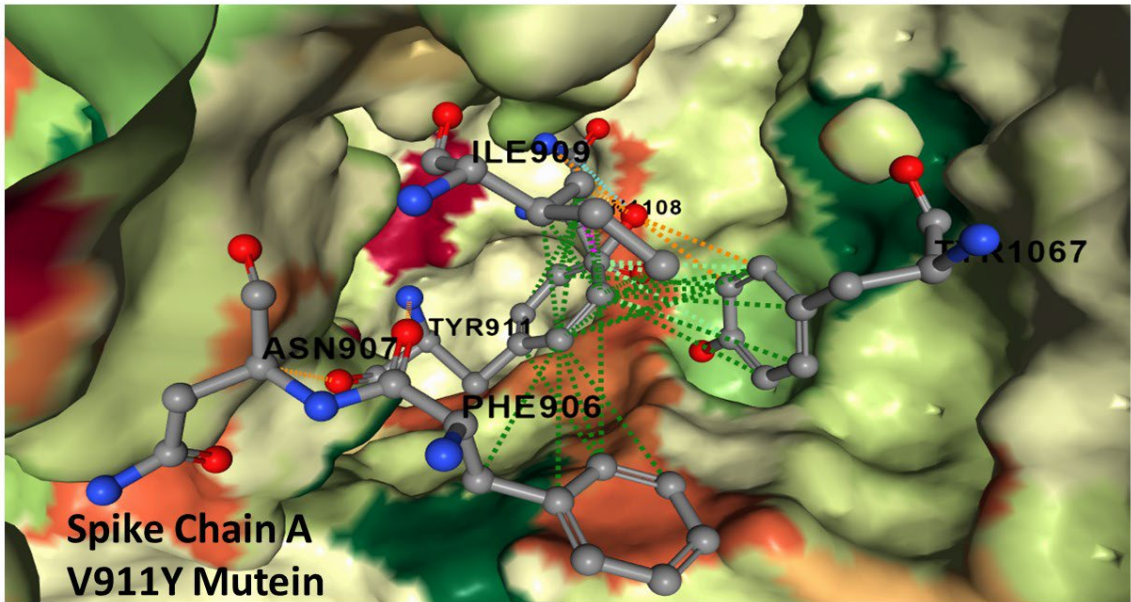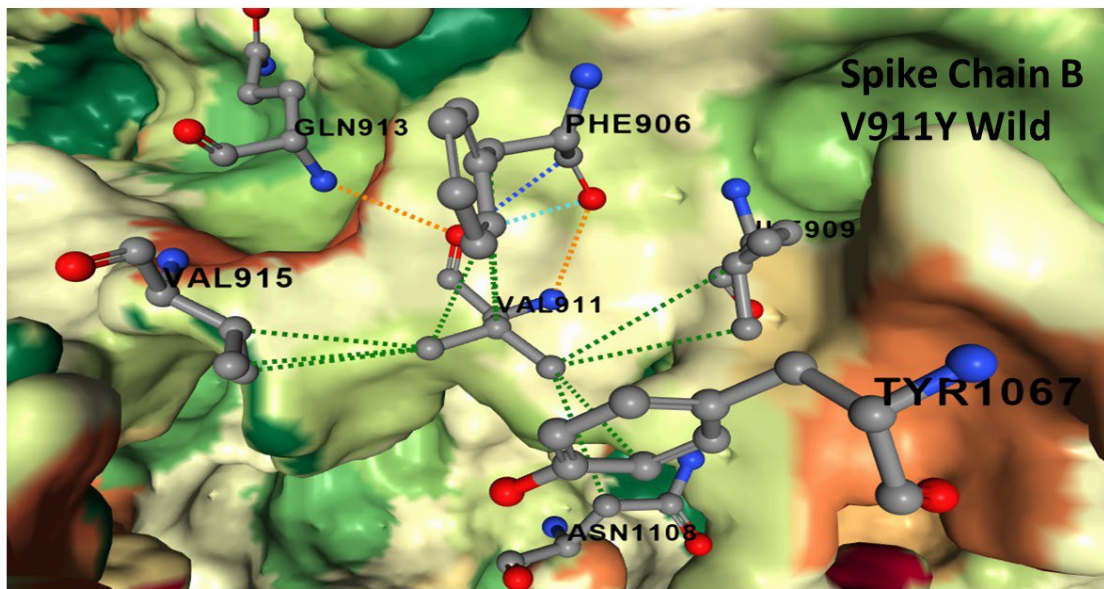

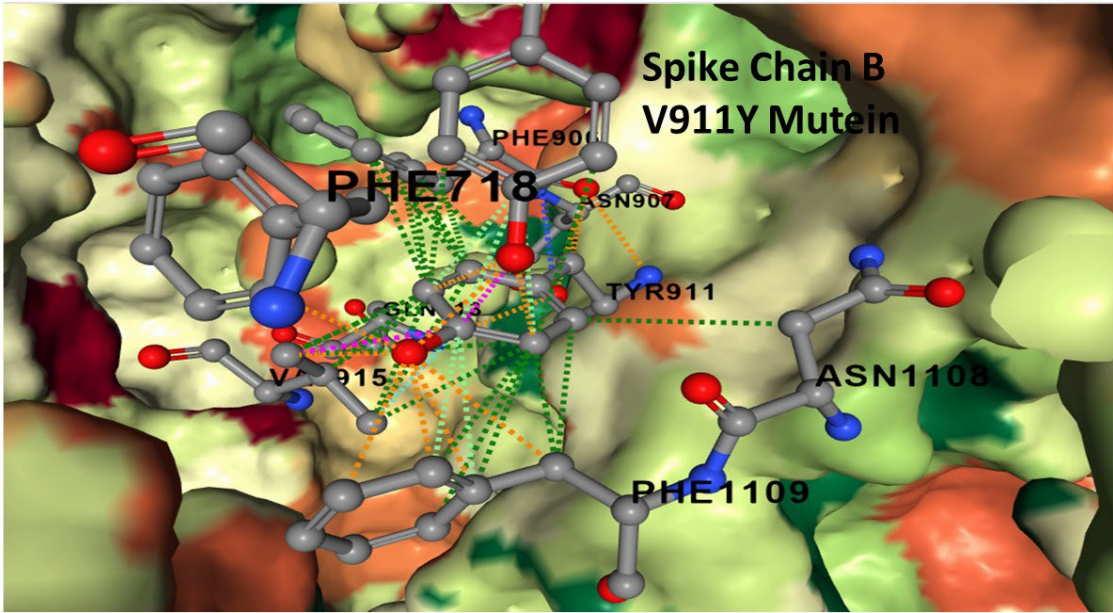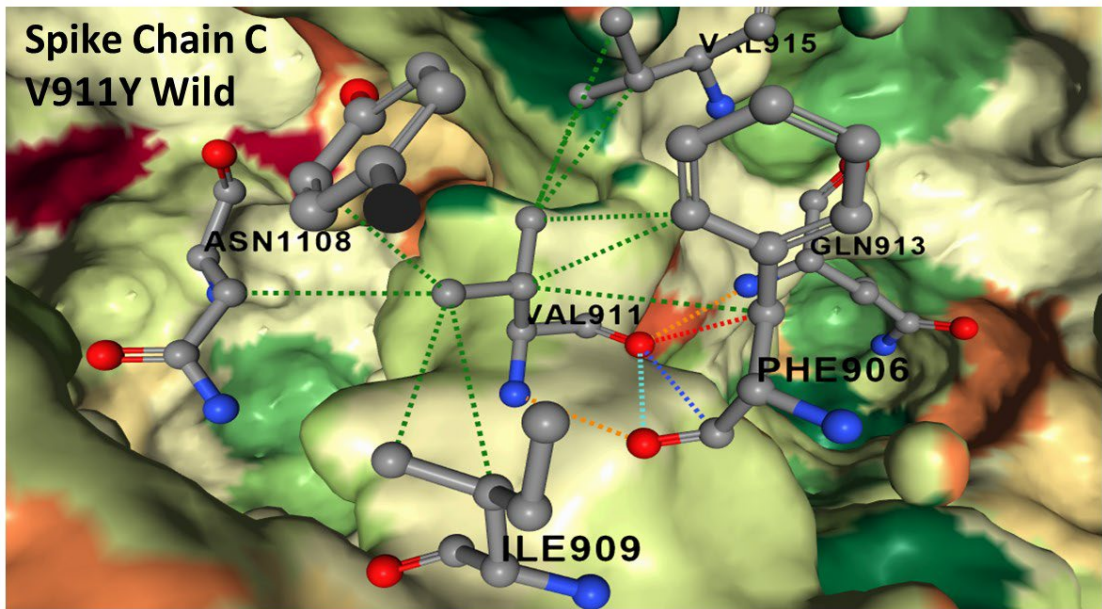



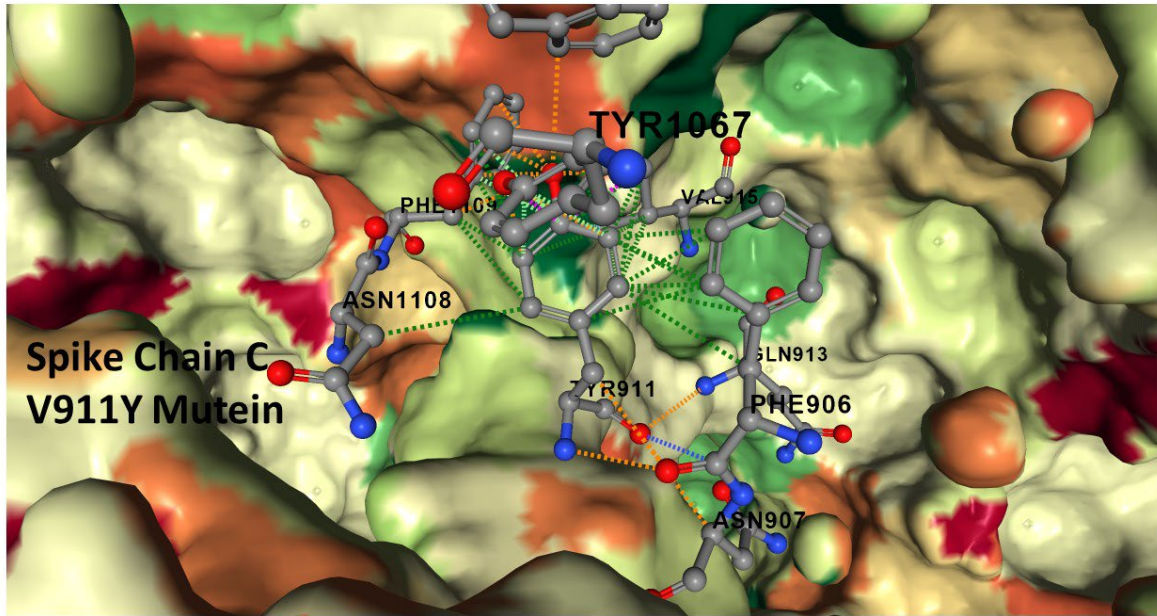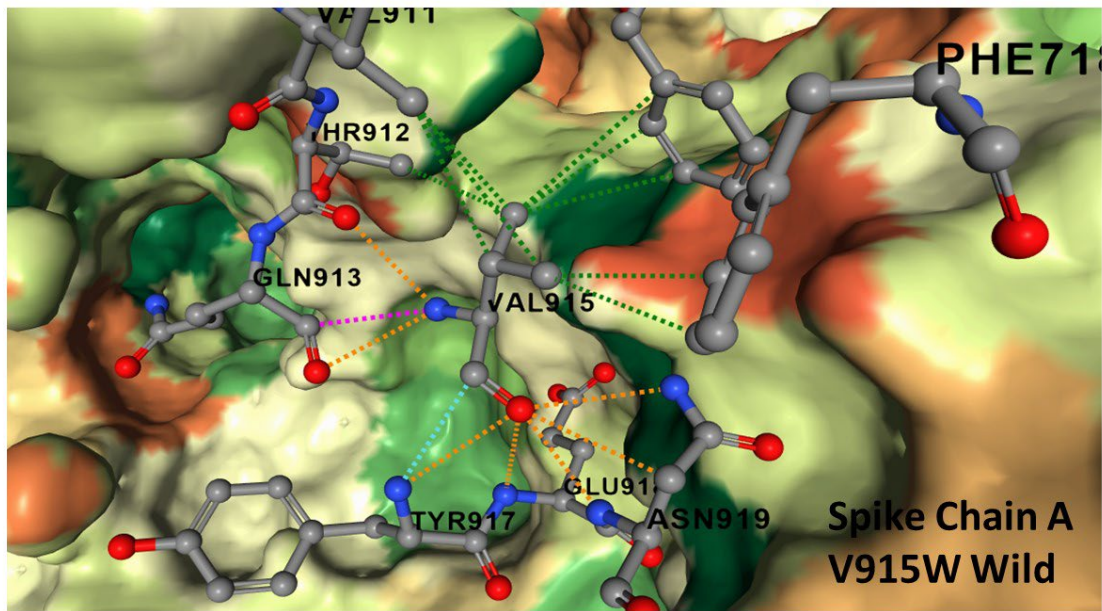

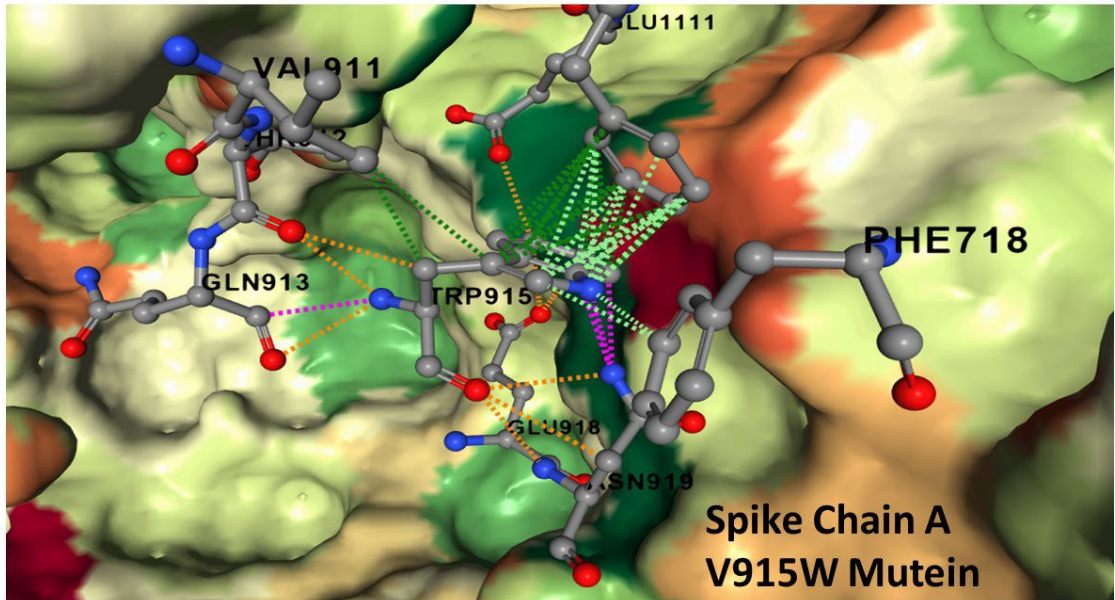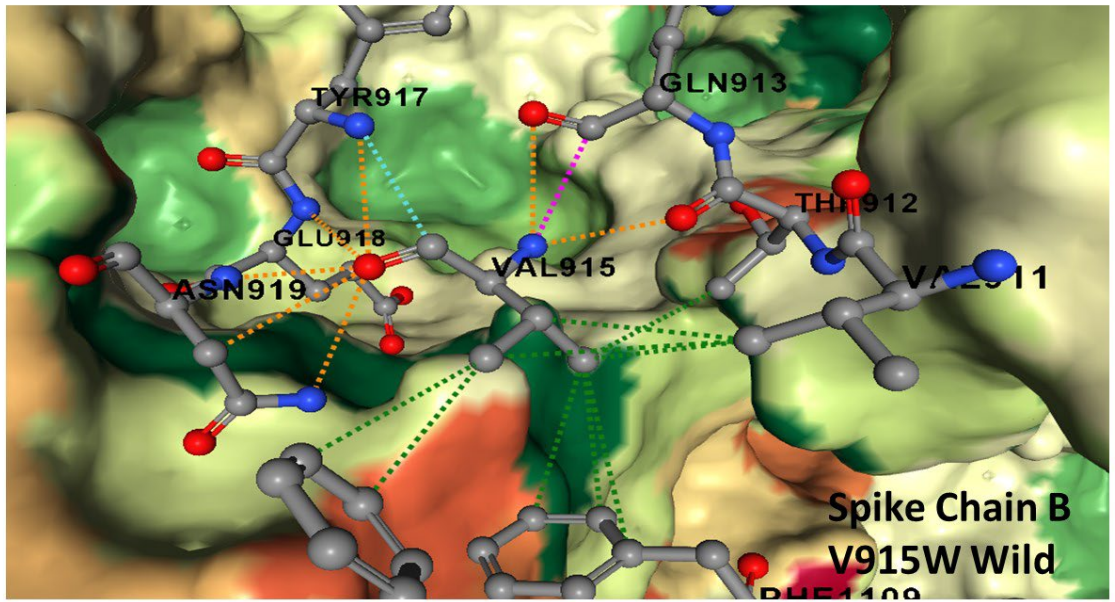



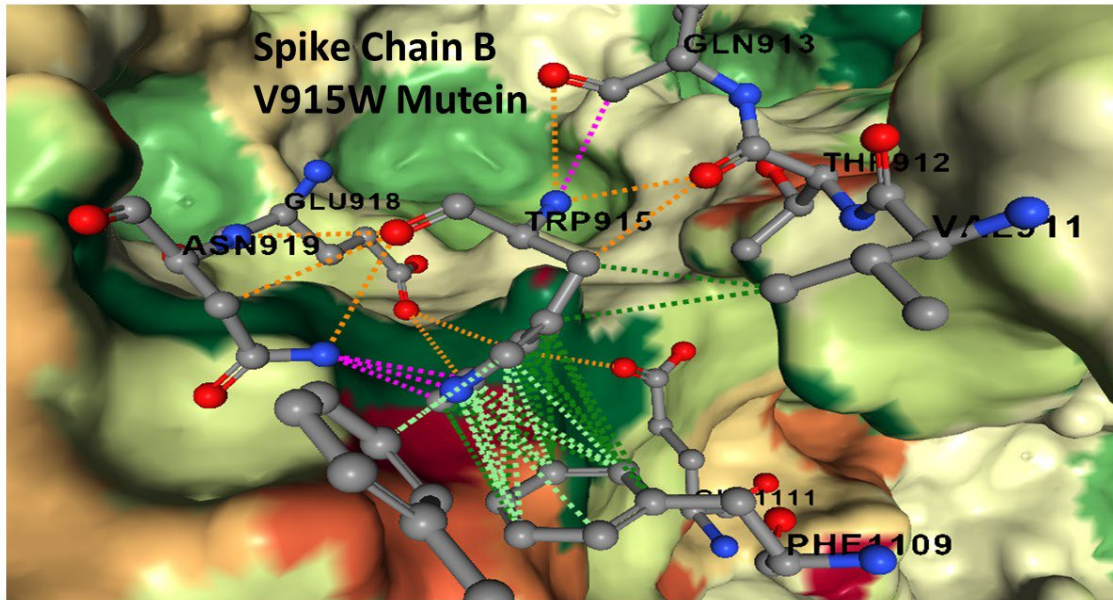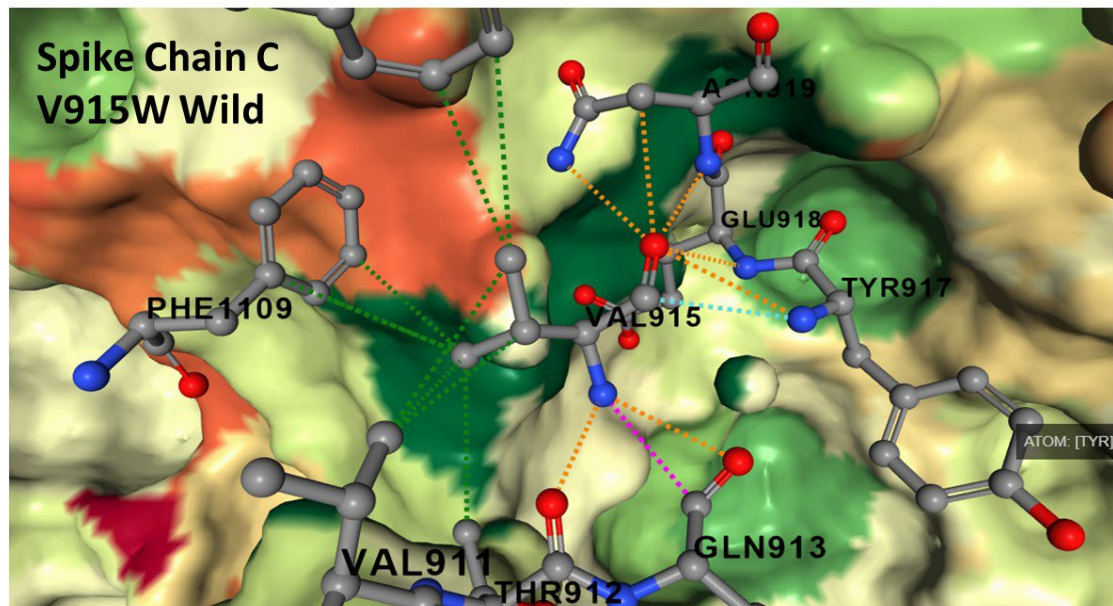

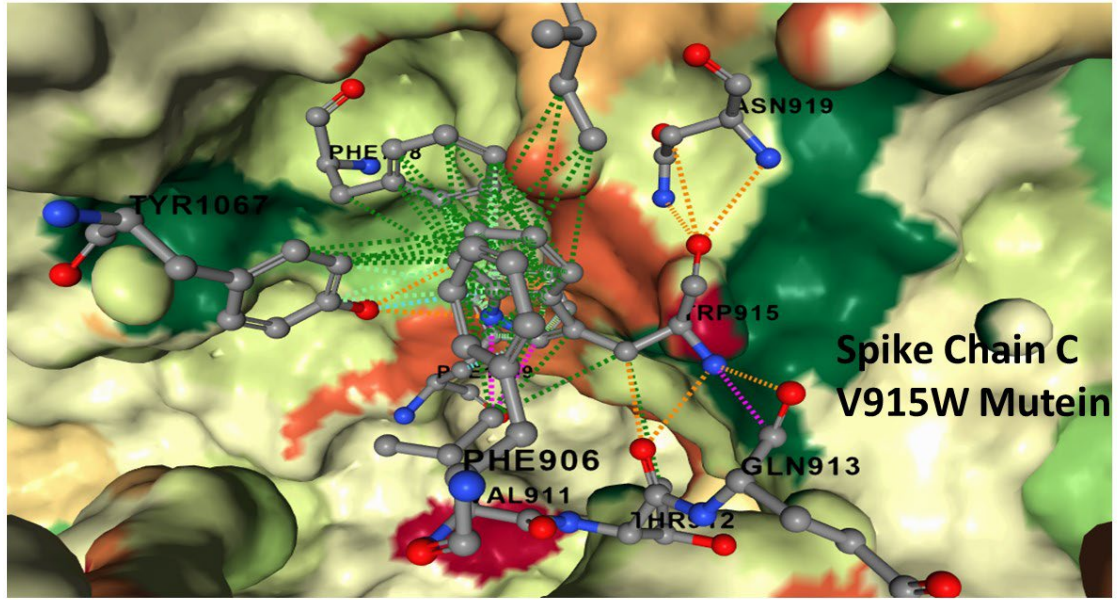

Supplement: Image2.pdf [file Image2.pdf]
