# Supplementary material for: Variant-specific deleterious mutations in the SARS-CoV-2 genome reveal immune responses and potentials for prophylactic vaccine development
Source: PubMed Central journal article supplement (PMC9941545; doi:10.3389/fphar.2023.1090717), 2023-02-07

# Effect of missense mutation on protein-protein interaction for Omicron variant (Spike Protein)

**E484A Wild**

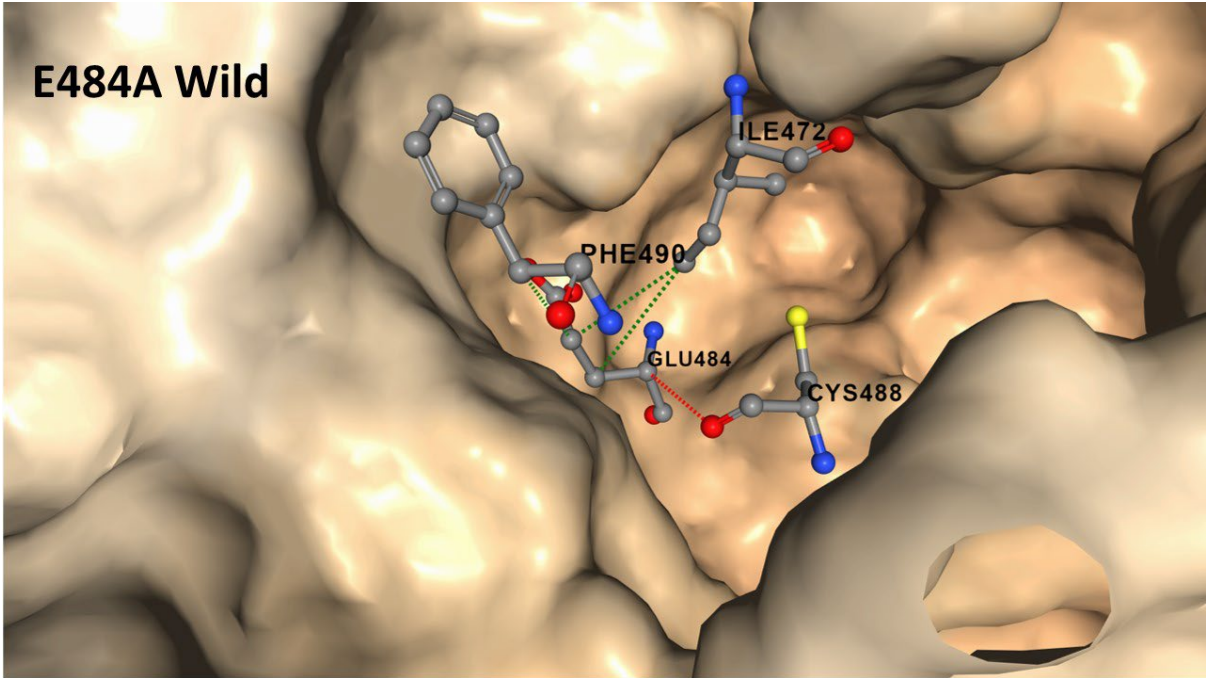

**E484A Mutein**

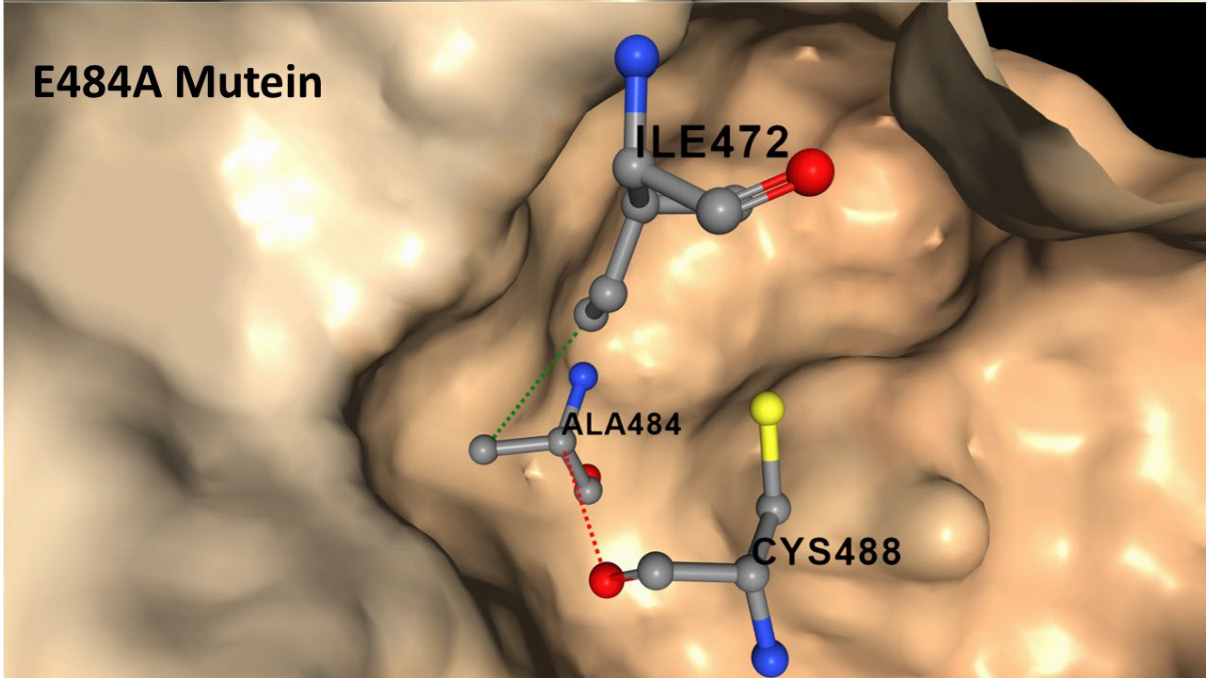

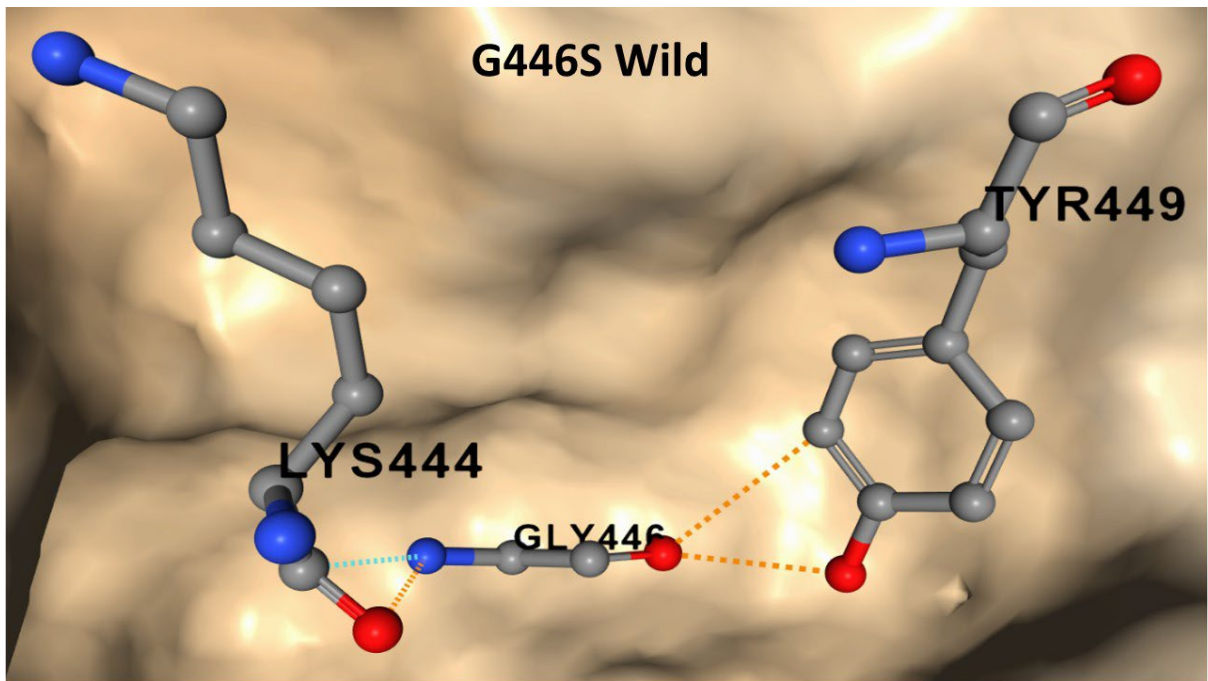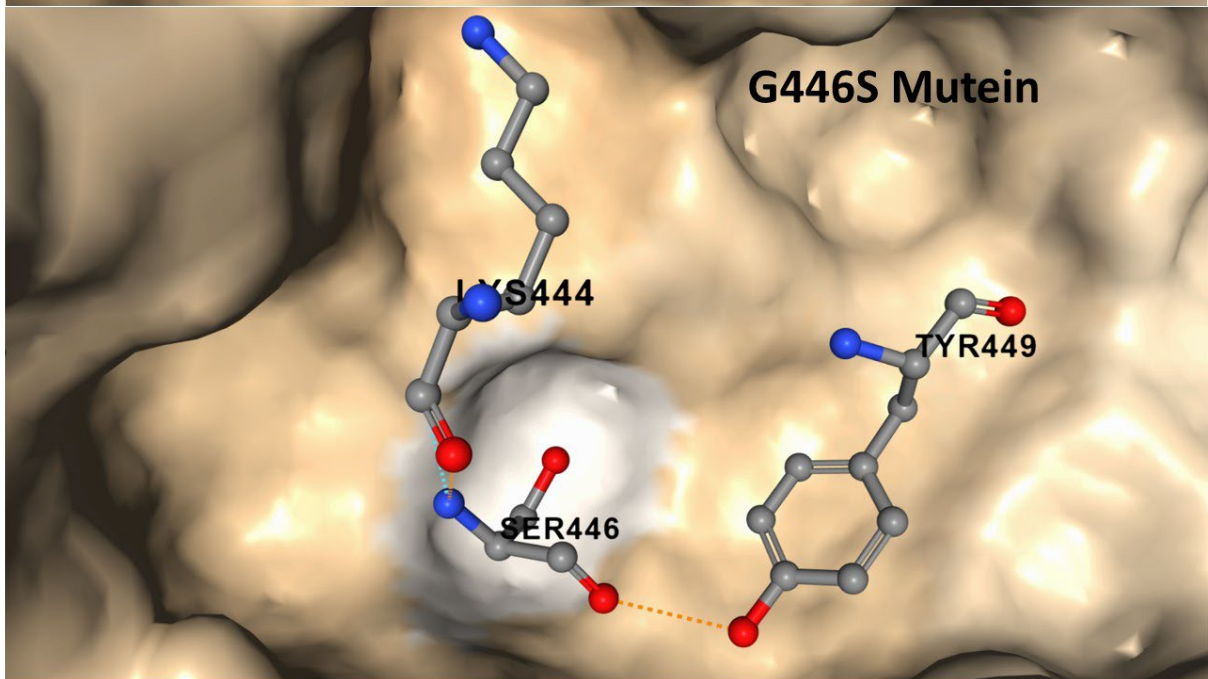



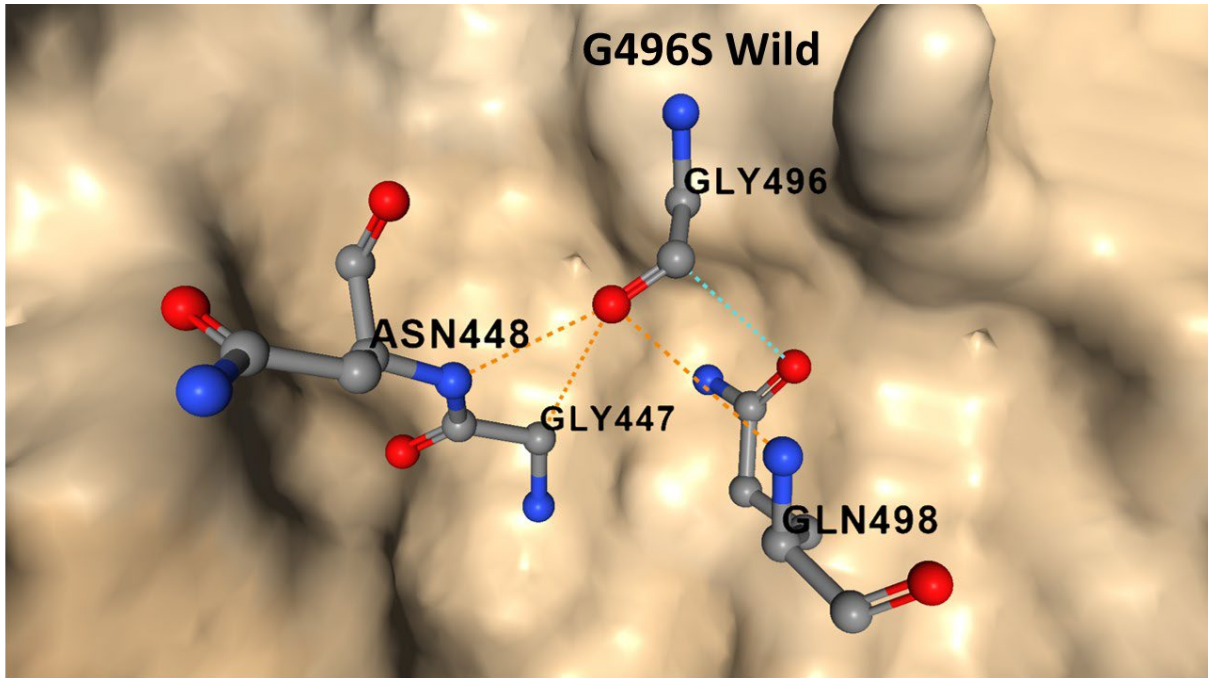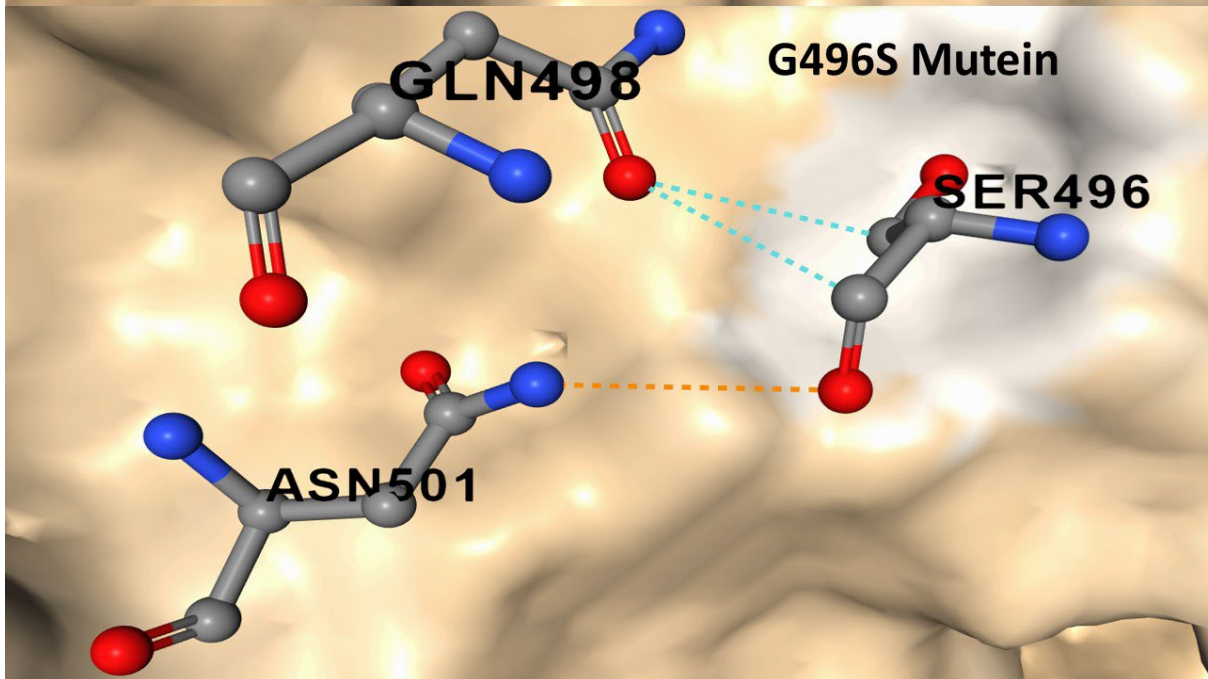

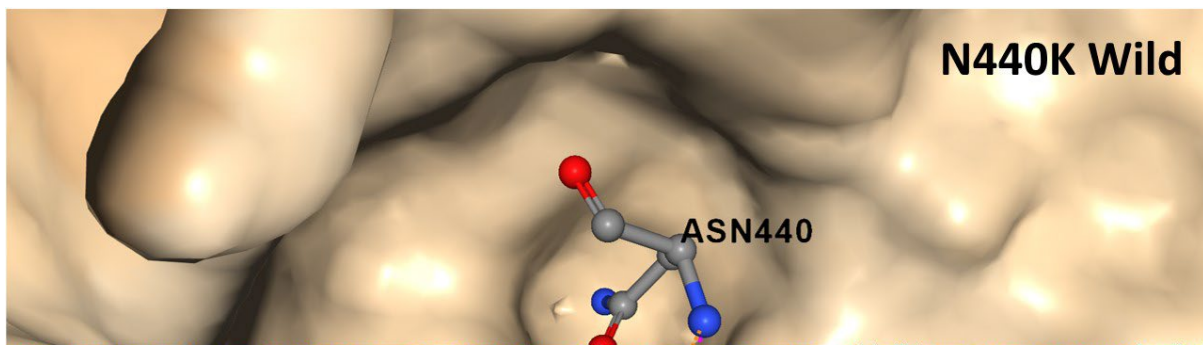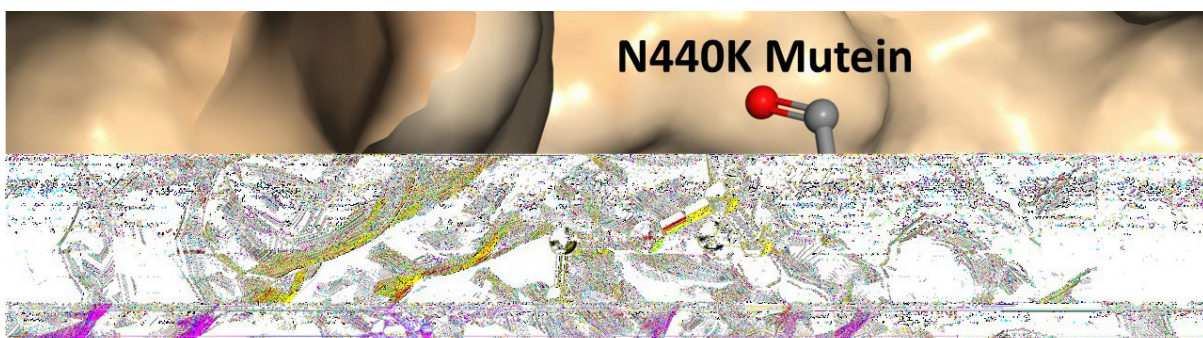

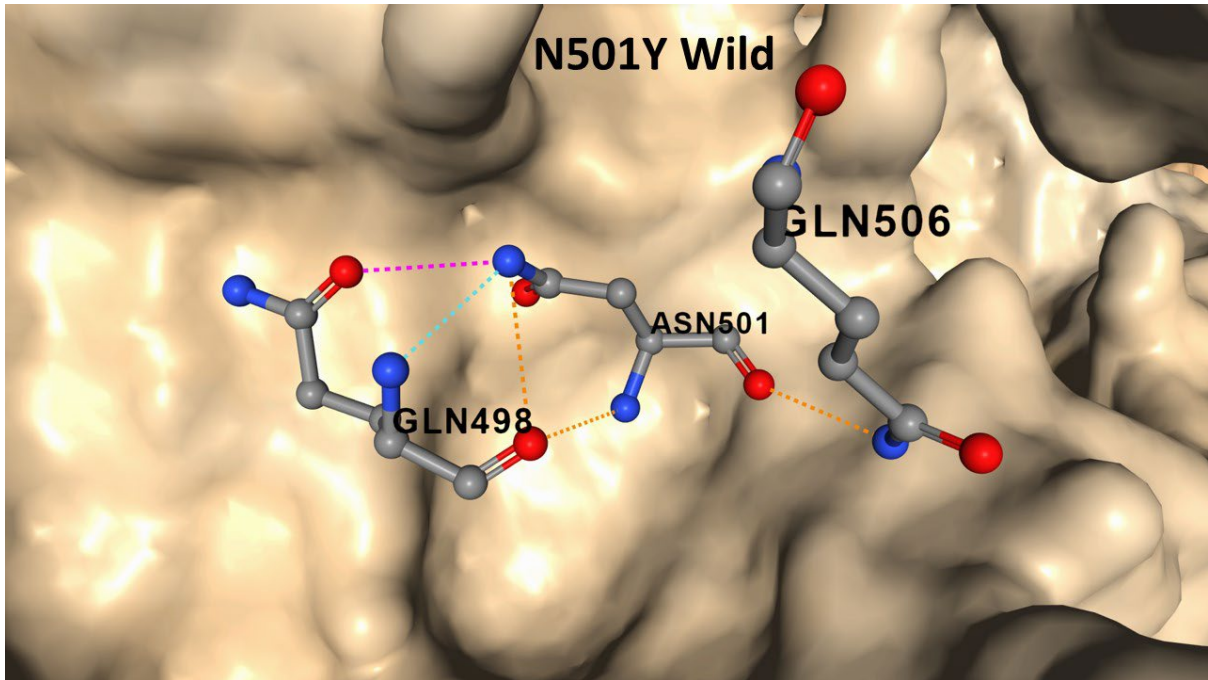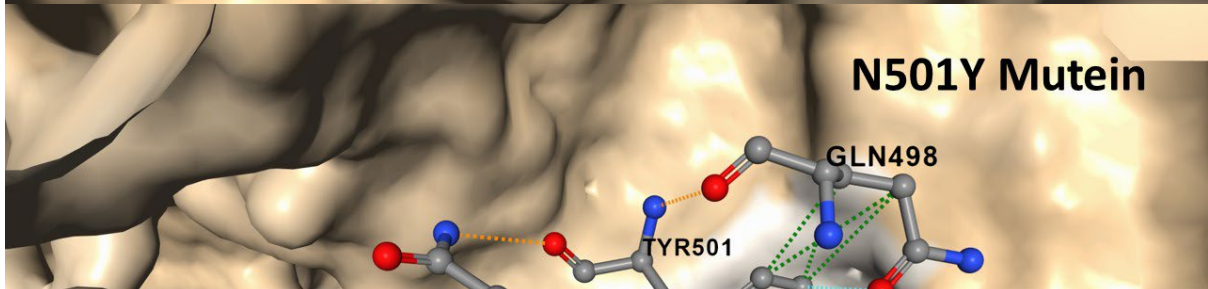



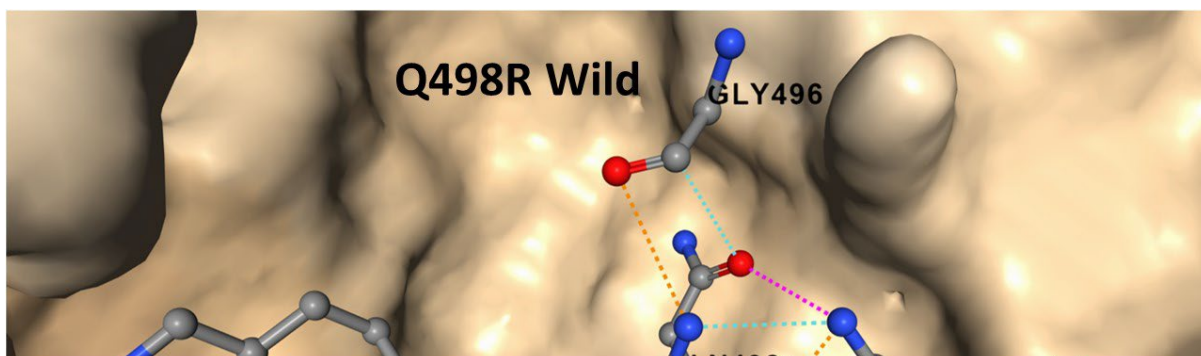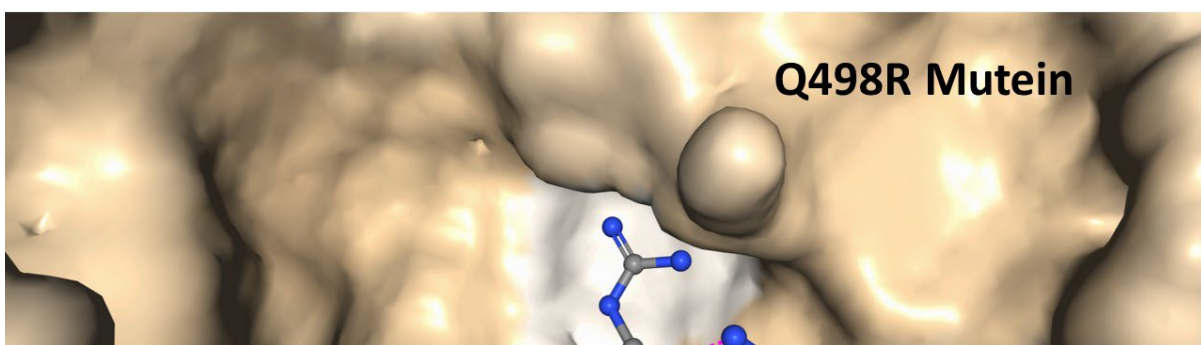

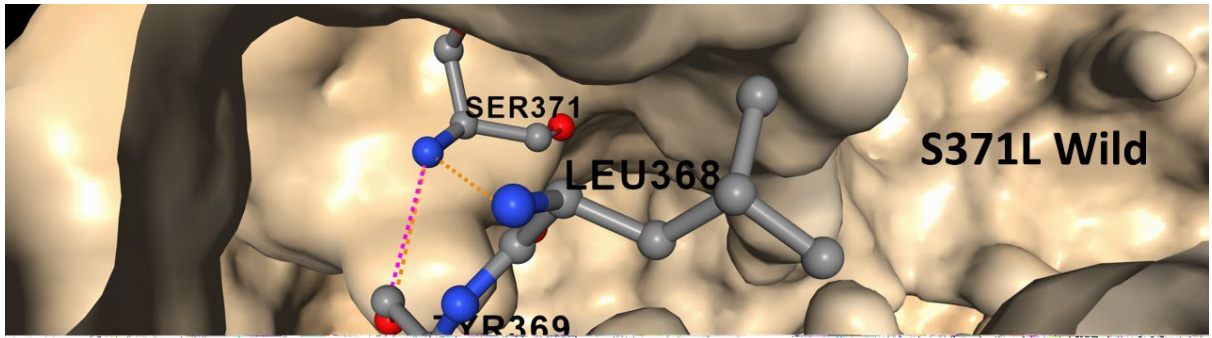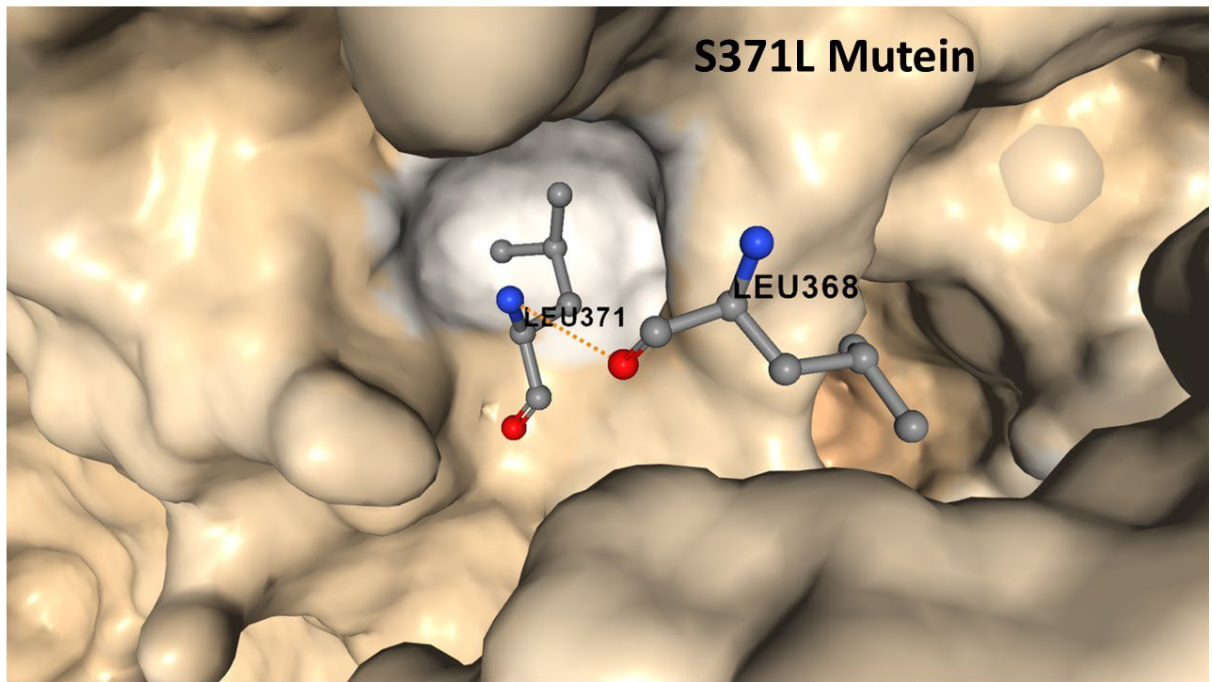



**S373P Wild**

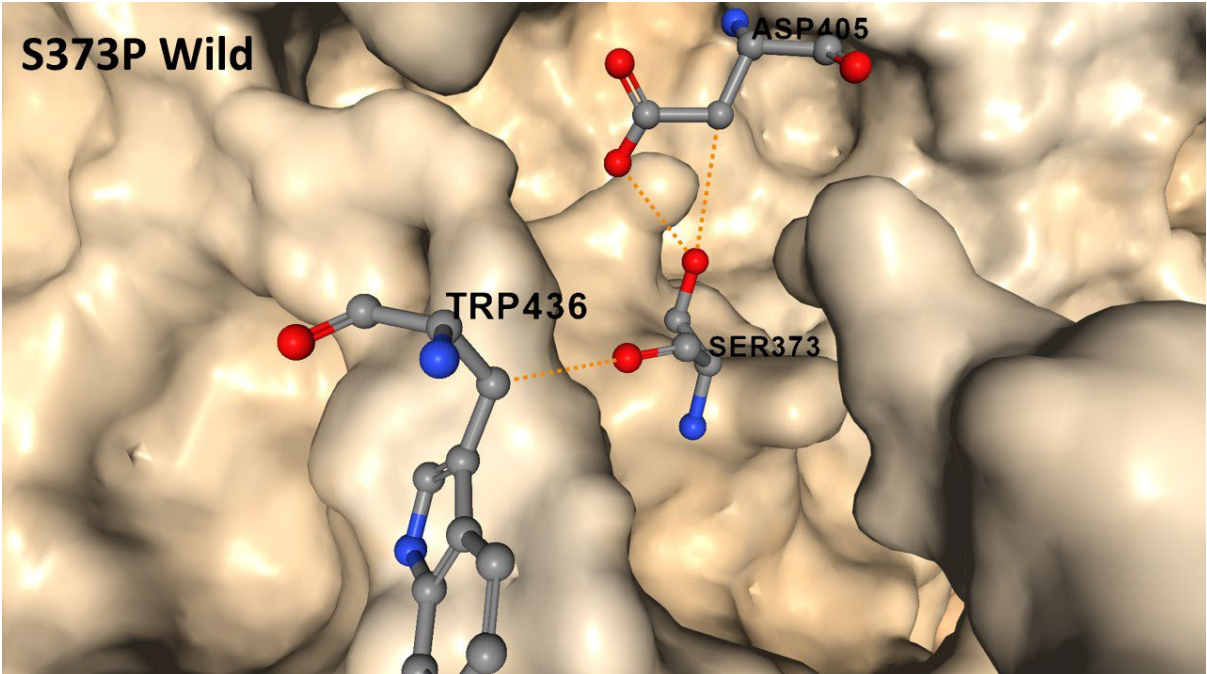

**S373P Mutain**

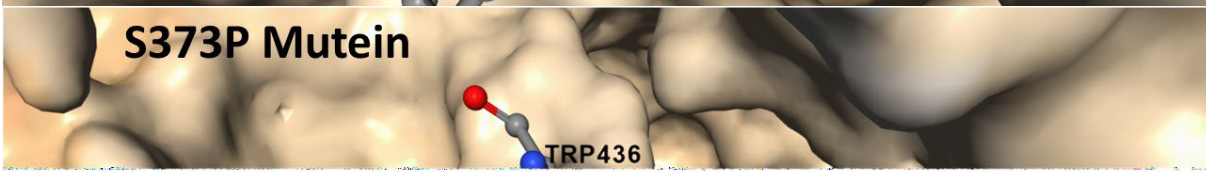

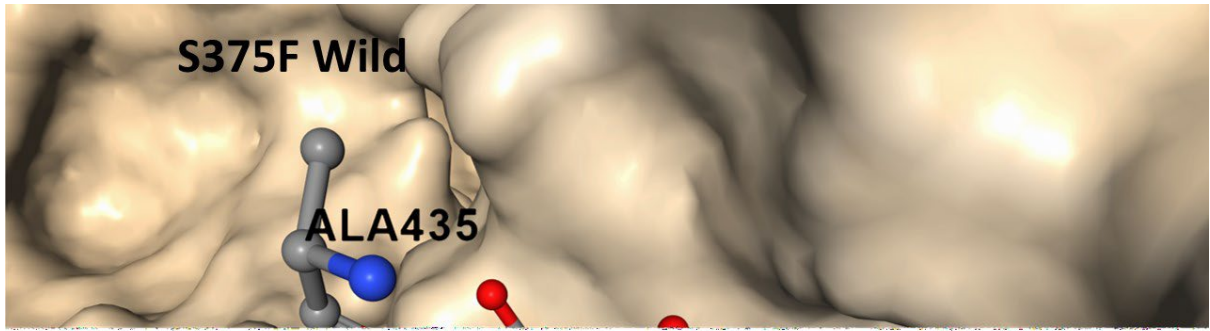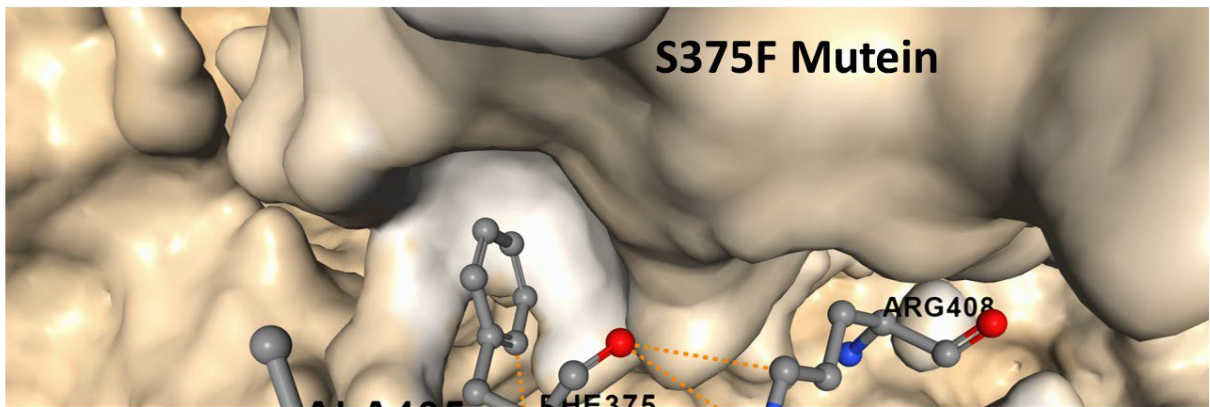

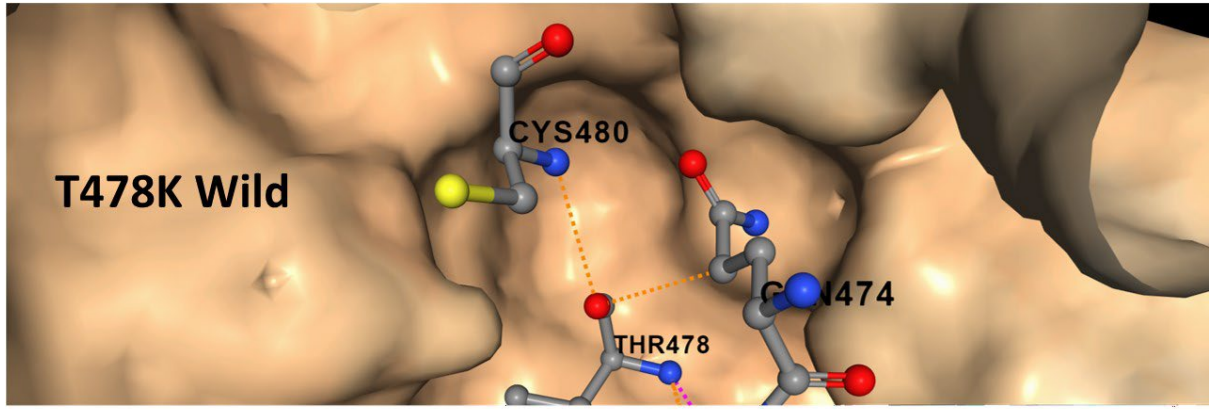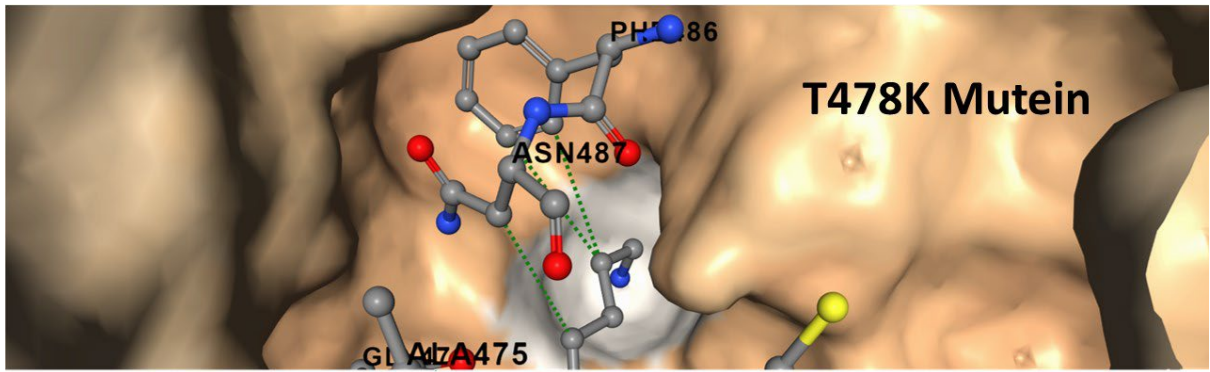

Supplement: Image3.pdf [file Image3.pdf]
