# Supplementary material for: Variant-specific deleterious mutations in the SARS-CoV-2 genome reveal immune responses and potentials for prophylactic vaccine development
Source: PubMed Central journal article supplement (PMC9941545; doi:10.3389/fphar.2023.1090717), 2023-02-07
Supplement: DataSheet2.pdf [file DataSheet2.pdf]

## SUPPLEMENTARY TABLE S9

### Sequences Derived From GISAID

#### Data Availability

GISAID Identifier: EPI\_SET\_221230br

doi: [10.55876/gis8.221230br](https://doi.org/10.55876/gis8.221230br)

All genome sequences and associated metadata in this dataset are published in GISAID's EpiCoV database. To view the contributors of each individual sequence with details such as accession number, Virus name, Collection date, Originating Lab and Submitting Lab and the list of Authors, visit [10.55876/gis8.221230br](https://gisaid.org/gis8.221230br)

#### Data Snapshot

- EPI\_SET\_221230br is composed of 220,652 individual genome sequences.
- The collection dates range from 2020-01-08 to 2022-01-31;
- Data were collected in 155 countries and territories;
- All sequences in this dataset are compared relative to hCoV-19/Wuhan/WIV04/2019 (WIV04), the official reference sequence employed by GISAID (EPI\_ISL\_402124). Learn more at <https://gisaid.org/WIV04>.
