# Supplementary material for: Variant-specific deleterious mutations in the SARS-CoV-2 genome reveal immune responses and potentials for prophylactic vaccine development
Source: PubMed Central journal article supplement (PMC9941545; doi:10.3389/fphar.2023.1090717), 2023-02-07

# Machine Learning Validation

## Logistic Regression

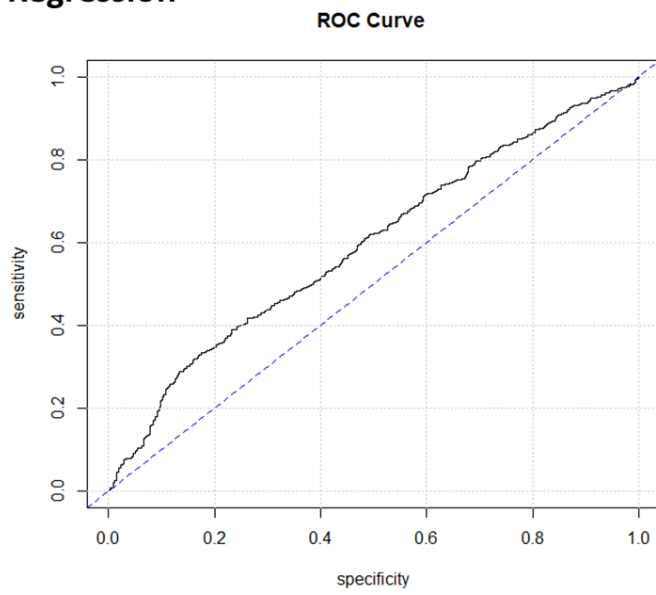

# Linear Discriminant Analysis

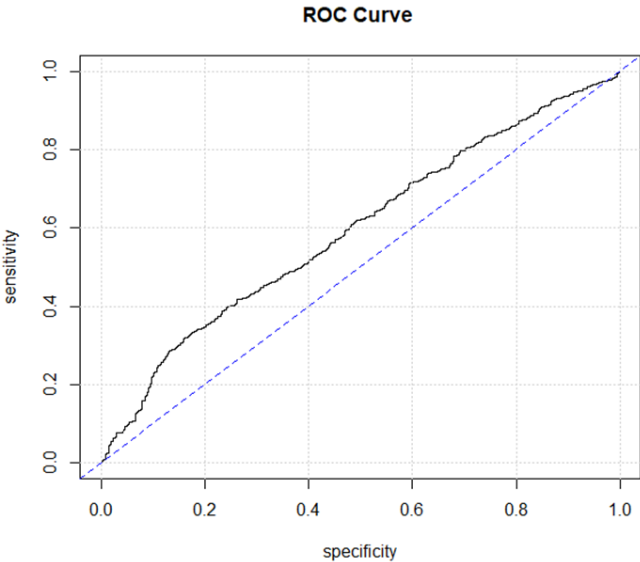

# Artificial Neural Network

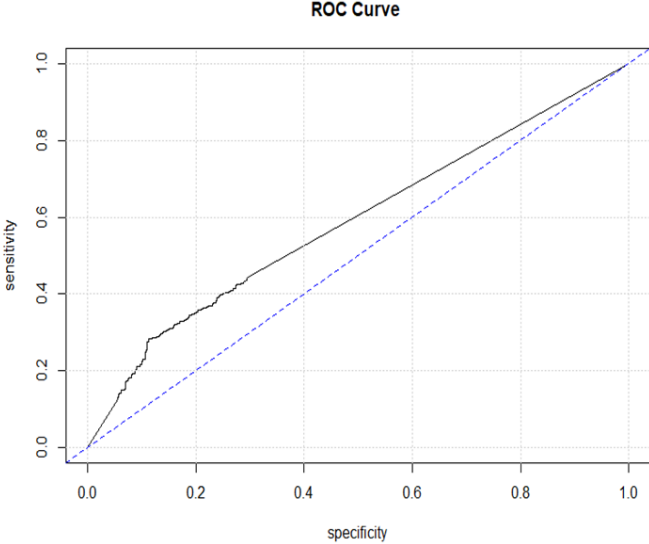

# Support Vector Machine

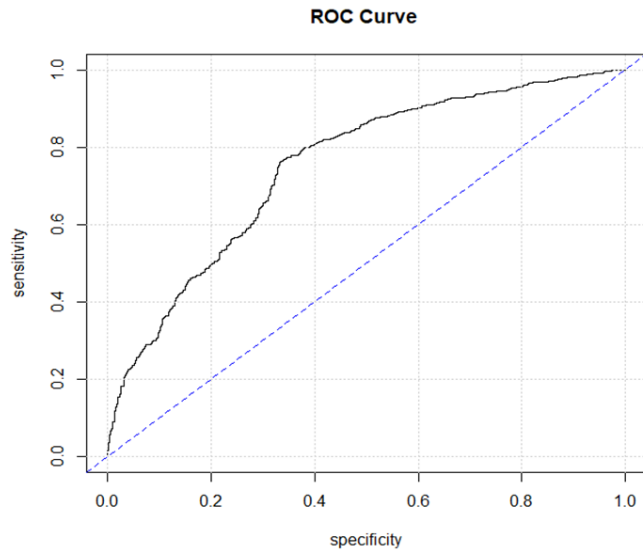

Supplement: Image4.pdf [file Image4.pdf]
